# Supplementary material for: Synthesis, structure and catalytic activity of manganese(ii) complexes derived from bis(imidazole)methane-based ligands
Source: Royal Society of Chemistry journal article supplement (doi:10.1039/c9dt03886h), 2019-12-09
Supplement: c9dt03886h1.pdf [file c9dt03886h1.pdf]

Electronic Supplementary Information (ESI)

**Synthesis, structure and catalytic activity of manganese (II) complexes derived from bis(imidazole)methane-based ligands**

**Hemanta Deka, Ankit Kumar, Soumyadip Patra, Mahendra K. Awasthi and Sanjay Kumar Singh\***

*Catalysis Group, Discipline of Chemistry, Indian Institute of Technology Indore, Simrol, Indore 453552, M.P., India*

**Table of Contents**

| <b>Description</b>                                                                                                                                                                                                             | <b>Page No.</b> |
|--------------------------------------------------------------------------------------------------------------------------------------------------------------------------------------------------------------------------------|-----------------|
| <b>Figure S1.</b> X-band EPR spectrum of <b>[Mn]-1</b> in methanol                                                                                                                                                             | S3              |
| <b>Figure S2.</b> X-band EPR spectrum of <b>[Mn]-2</b> in methanol                                                                                                                                                             | S3              |
| <b>Figure S3.</b> X-band EPR spectrum of <b>[Mn]-3</b> in methanol                                                                                                                                                             | S4              |
| <b>Figure S4.</b> ESI-MS analysis of controlled experiments                                                                                                                                                                    | S6              |
| <b>Figure S5.</b> <sup>1</sup> H NMR spectra of the crude reaction mixture, showing the formation of aldehyde intermediate during the oxidative coupling of benzylamine ( <b>1a</b> ) to ( <b>2a</b> )                         | S7              |
| <b>Figure S6.</b> <sup>1</sup> H NMR spectra of the crude reaction mixture performing in the water, showing the formation of aldehyde intermediate during the oxidative coupling of benzylamine ( <b>1a</b> ) to ( <b>2a</b> ) | S7              |
| <b>Figure S7.</b> FT-IR spectrum of ligand <b>L1</b> in KBr pallet                                                                                                                                                             | S8              |
| <b>Figure S8.</b> FT-IR spectrum of ligand <b>L2</b> in KBr pallet                                                                                                                                                             | S8              |
| <b>Figure S9.</b> FT-IR spectrum of ligand <b>L3</b> in KBr pallet                                                                                                                                                             | S9              |
| <b>Figure S10.</b> <sup>1</sup> H NMR spectrum of <b>L1</b> in CDCl <sub>3</sub>                                                                                                                                               | S9              |
| <b>Figure S11.</b> <sup>1</sup> H NMR spectrum of <b>L2</b> in CDCl <sub>3</sub>                                                                                                                                               | S10             |
| <b>Figure S12.</b> <sup>1</sup> H NMR spectrum of <b>L3</b> in CDCl <sub>3</sub>                                                                                                                                               | S10             |
| <b>Figure S13.</b> <sup>13</sup> C NMR spectrum of <b>L1</b> in CDCl <sub>3</sub>                                                                                                                                              | S11             |
| <b>Figure S14.</b> <sup>13</sup> C NMR spectrum of <b>L2</b> in CDCl <sub>3</sub>                                                                                                                                              | S11             |
| <b>Figure S15.</b> <sup>13</sup> C NMR spectrum of <b>L3</b> in CDCl <sub>3</sub>                                                                                                                                              | S12             |
| <b>Figure S16.</b> ESI-mass spectrum of <b>L1</b> in methanol                                                                                                                                                                  | S12             |

|                                                                                                                               |         |
|-------------------------------------------------------------------------------------------------------------------------------|---------|
| <b>Figure S17.</b> ESI-mass spectrum of <b>L2</b> in methanol                                                                 | S13     |
| <b>Figure S18.</b> ESI-mass spectrum of <b>L3</b> in methanol                                                                 | S13     |
| <b>Figure S19.</b> FT-IR spectrum of <b>[Mn]-1</b> in KBr pallet                                                              | S14     |
| <b>Figure S20.</b> FT-IR spectrum of <b>[Mn]-2</b> in KBr pallet                                                              | S14     |
| <b>Figure S21.</b> FT-IR spectrum of <b>[Mn]-3</b> in KBr pallet                                                              | S15     |
| <b>Figure S22.</b> ESI-mass spectrum of <b>[Mn]-1</b> in methanol                                                             | S15     |
| <b>Figure S23.</b> ESI-mass spectrum of <b>[Mn]-2</b> in methanol                                                             | S16     |
| <b>Figure S24.</b> ESI-mass spectrum of <b>[Mn]-3</b> in methanol                                                             | S16     |
| <b>Figure S25.</b> GC-MS for entry 1 of table 1                                                                               | S17     |
| <b>Figure S26.</b> GC-MS for entry 2 of table 1                                                                               | S17     |
| <b>Figure S27.</b> GC-MS for entry 3 of table 1                                                                               | S18     |
| <b>Figure S28.</b> GC-MS for entry 4 of table 1                                                                               | S18     |
| <b>Figure S29.</b> GC-MS for entry 5 of table 1                                                                               | S19     |
| <b>Figure S30.</b> GC-MS for <b>2b</b>                                                                                        | S19     |
| <b>Figure S31.</b> GC-MS for <b>2c</b>                                                                                        | S20     |
| <b>Figure S32.</b> GC-MS for <b>2d</b>                                                                                        | S21     |
| <b>Figure S33.</b> GC-MS for <b>2e</b>                                                                                        | S22     |
| <b>Figure S34.</b> GC-MS for <b>2f</b>                                                                                        | S23     |
| <b>Figure S35.</b> GC-MS for <b>2g</b>                                                                                        | S24     |
| <b>Figure S36.</b> GC-MS for <b>2h</b>                                                                                        | S25     |
| <b>Figure S37.</b> GC-MS for <b>2i</b>                                                                                        | S26     |
| <b>Figure S38.</b> GC-MS for <b>2j</b>                                                                                        | S27     |
| <b>Table S1.</b> Crystallographic data for complexes <b>[Mn]-1</b> and <b>[Mn]-2</b> .                                        | S27-S28 |
| <b>Table S2.</b> Selected bond parameters of complexes <b>[Mn]-1</b> and <b>[Mn]-2</b> .                                      | S28-S29 |
| <b>Table S3.</b> Comparative chart showing the literature available catalysts explored for oxidative coupling of benzylamines | S30-S31 |
| References                                                                                                                    | S32     |

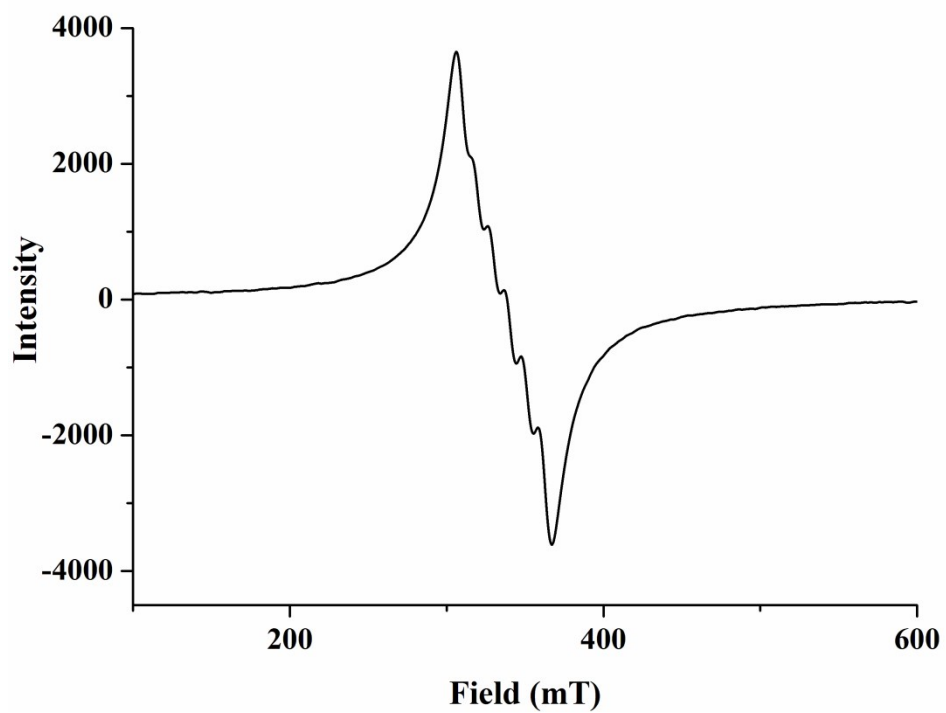

**Figure S1.** X-band EPR spectrum of [Mn]-1 in methanol.

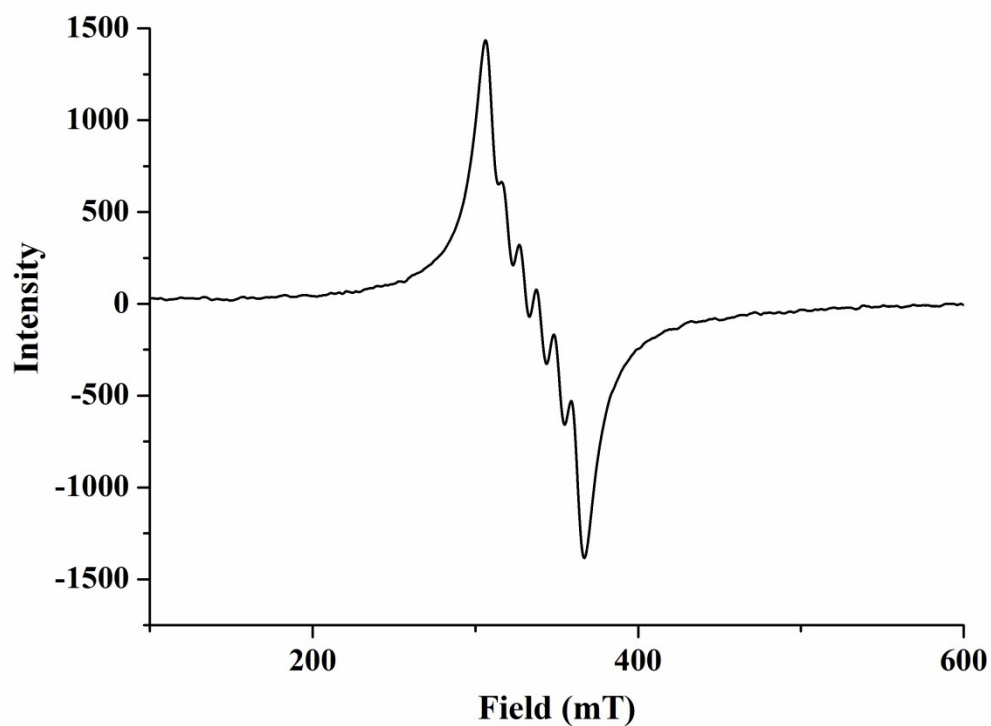

**Figure S2.** X-band EPR spectrum of [Mn]-2 in methanol.

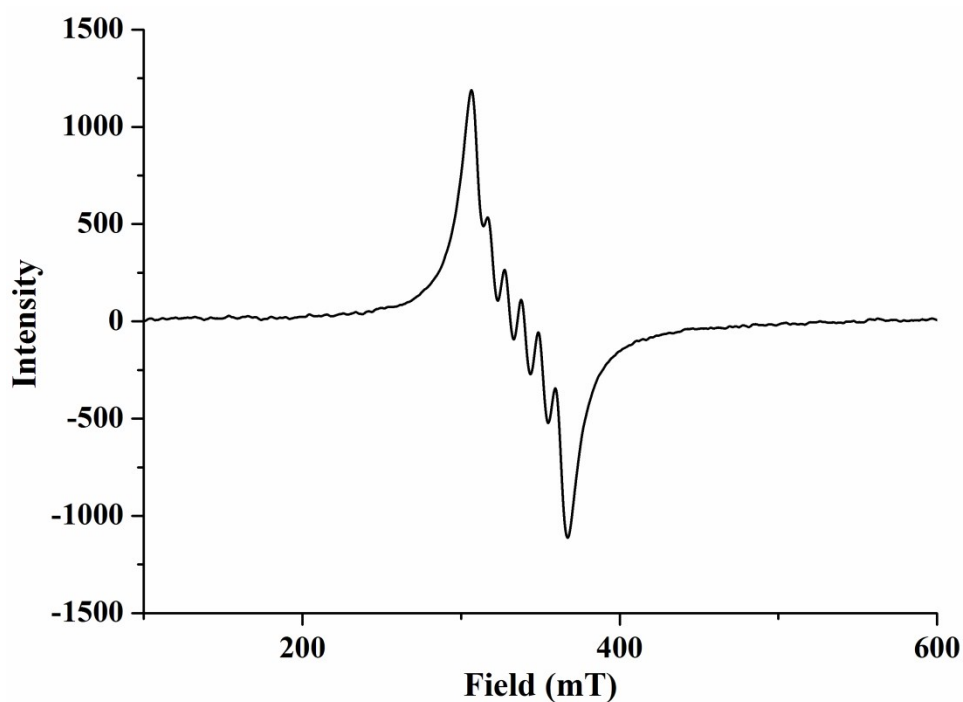

**Figure S3.** X-band EPR spectrum of [Mn]-3 in methanol.

**Controlled experiments for identification of catalytic species and intermediates.**

Controlled experiments are performed by stirring the complex [Mn]-3 with amines {benzyl amine (**1a**) or *p*-methyl benzyl amine (**1e**)} (cat/amine = 1:5 molar ratio) at 60 °C for 5 hours. Reaction aliquots are analyzed by ESI-MS analysis, which inferred the presence of several amine coordinated Mn(II) species (Figure S4). Moreover, the organic components of the crude reaction mixture are extracted in diethyl ether and analyzed by NMR in CDCl<sub>3</sub> (Figure S5).

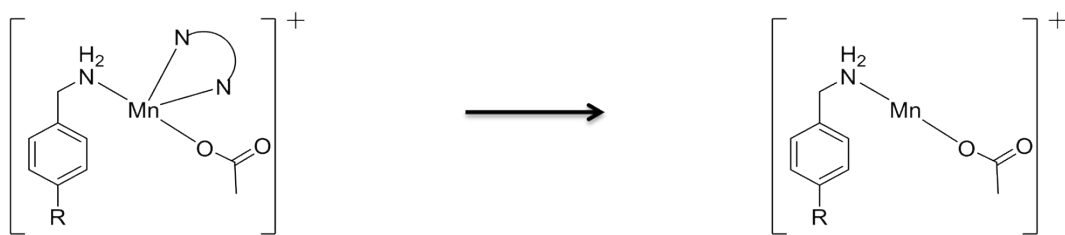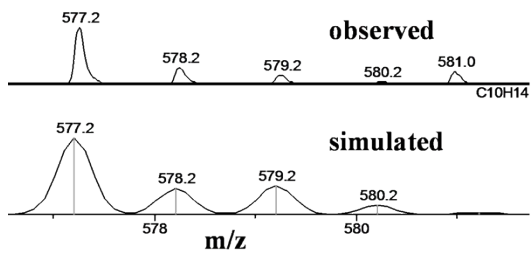

**R=CH<sub>3</sub>, m/z =577**

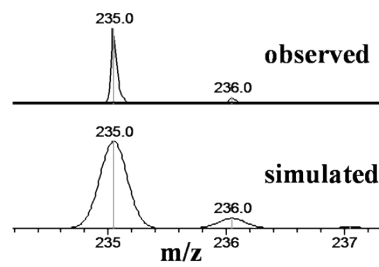

**R=CH<sub>3</sub>, m/z =235**

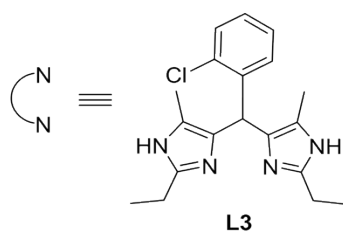

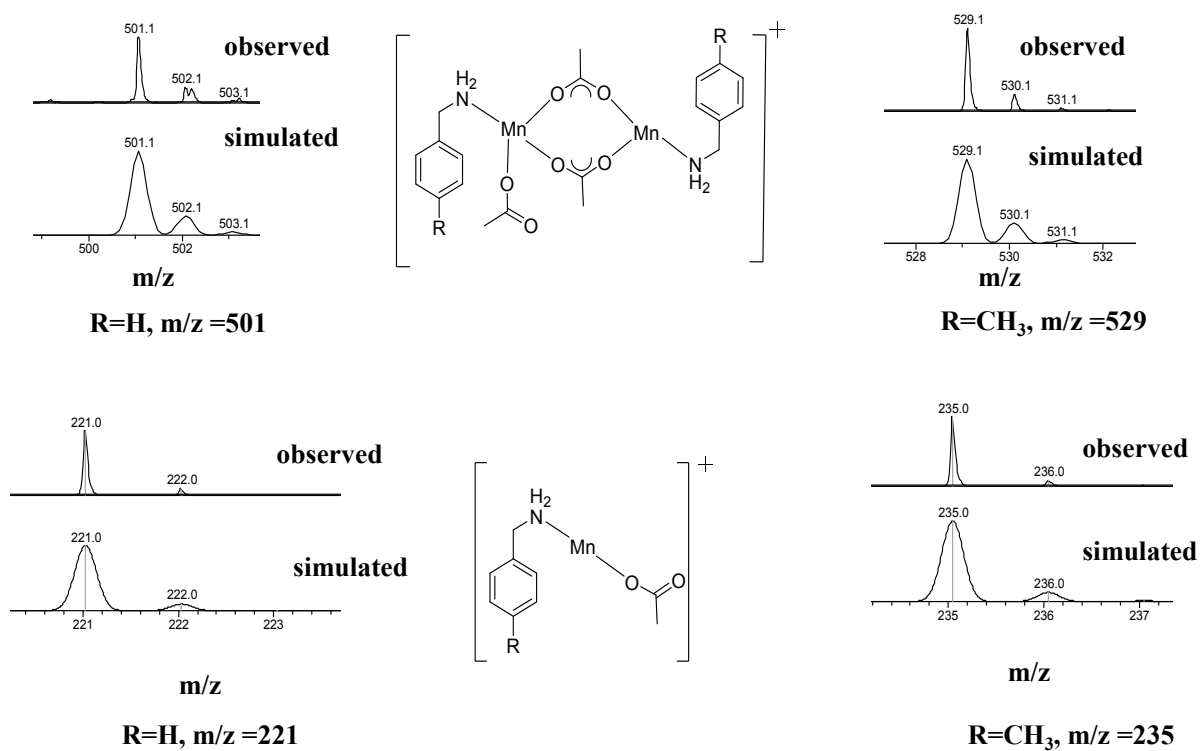

**Figure S4.** ESI-MS analysis of controlled experiments.

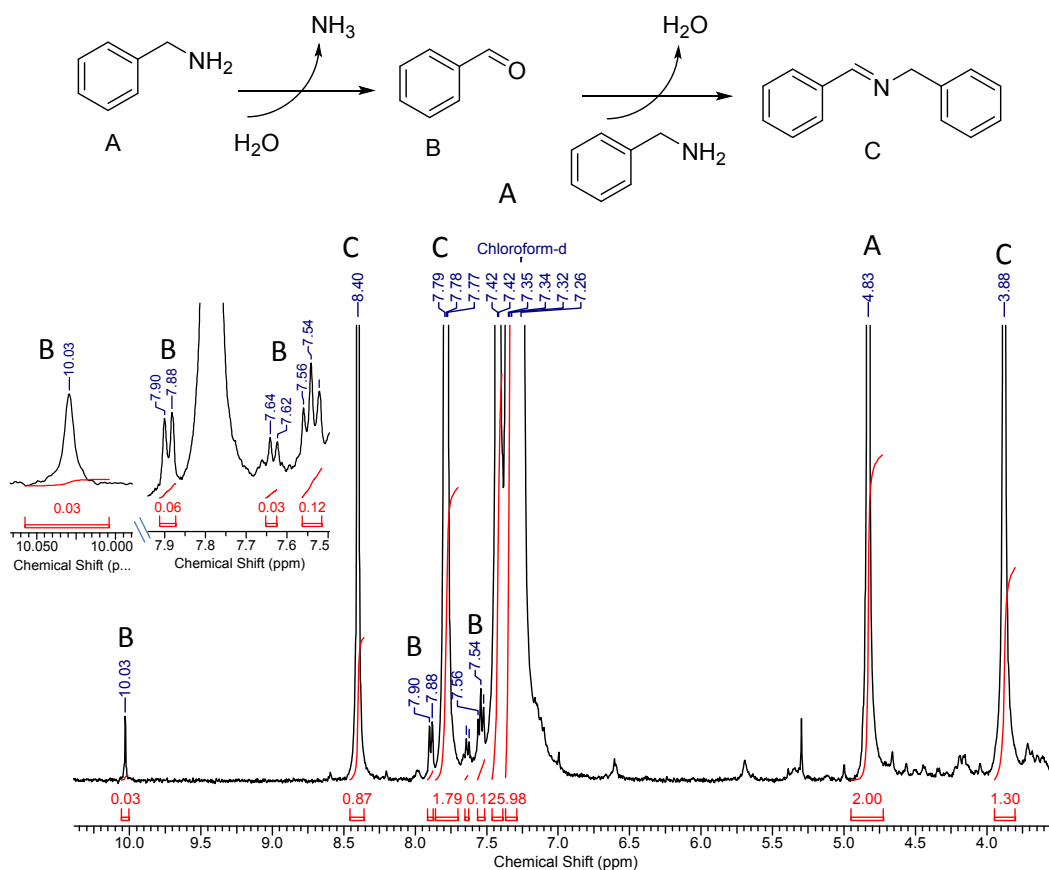

**Figure S5.**  $^1\text{H}$  NMR spectra of the crude reaction mixture, showing the formation of aldehyde intermediate during the oxidative coupling of benzylamine (**1a**) to (**2a**).

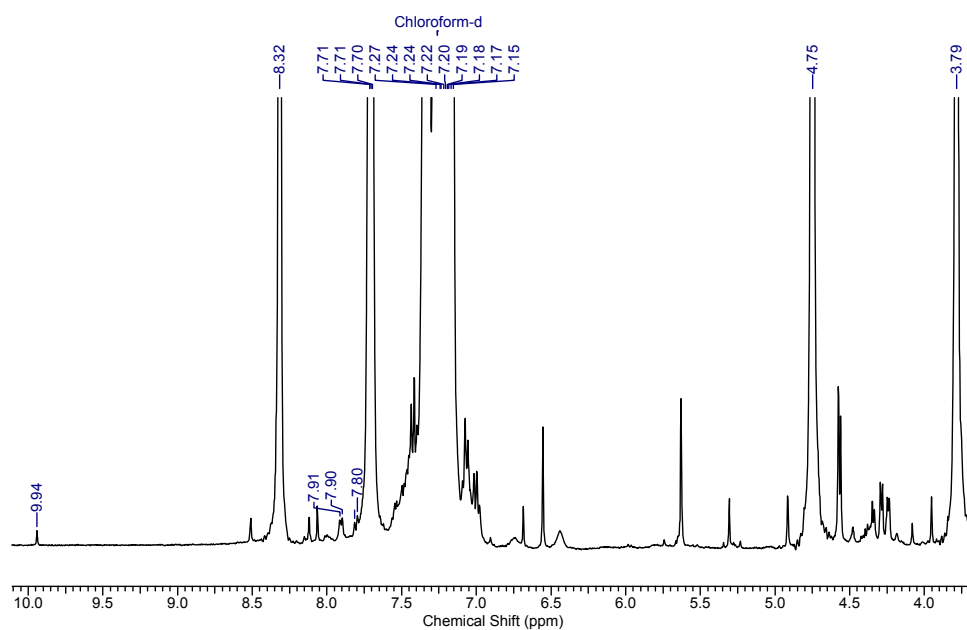

**Figure S6.**  $^1\text{H}$  NMR spectra of the crude reaction mixture performed in water, showing the formation of aldehyde intermediate during the oxidative coupling of benzylamine (**1a**) to (**2a**).

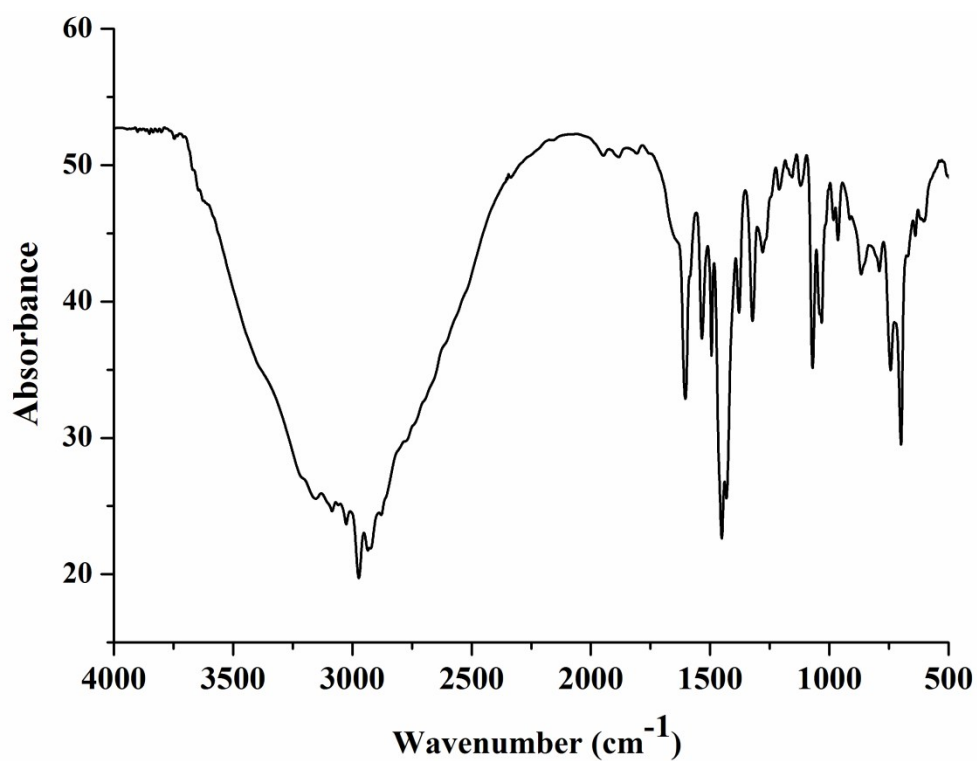

Figure S7. FT-IR spectrum of ligand L1 in KBr pellet.

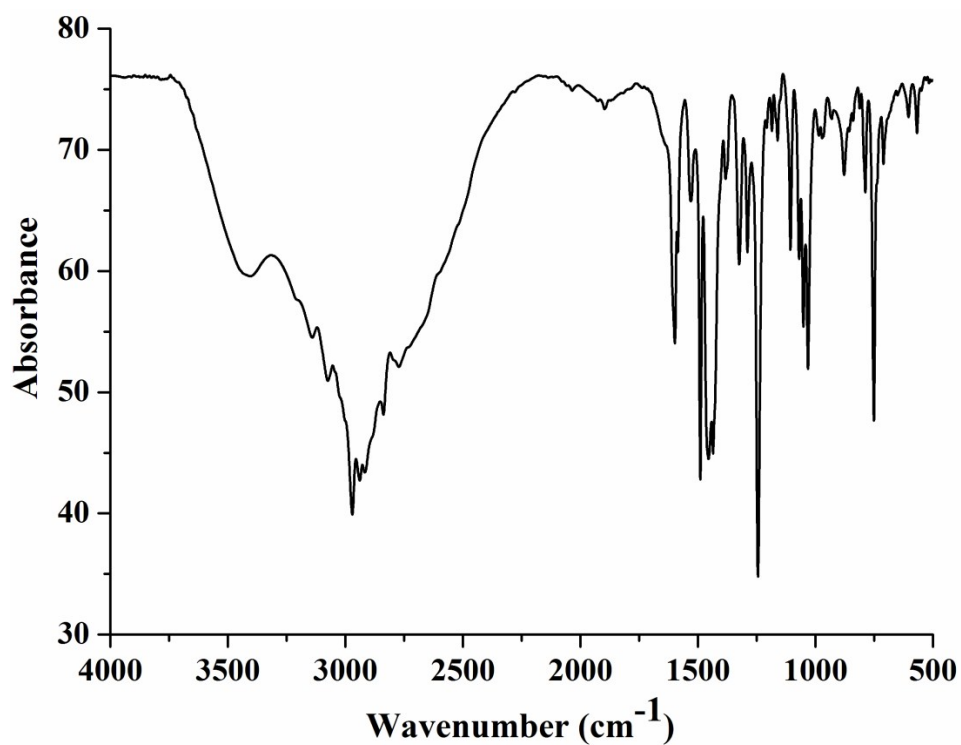

Figure S8. FT-IR spectrum of ligand L2 in KBr pellet.



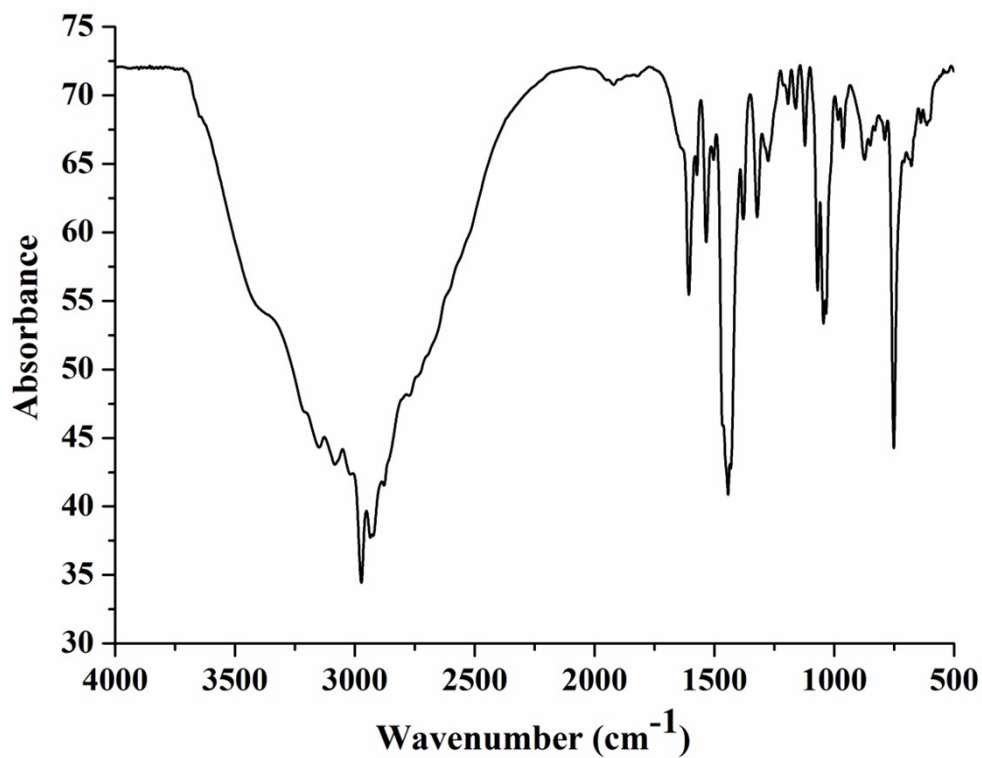

Figure S9. FT-IR spectrum of ligand L3 in KBr pellet.

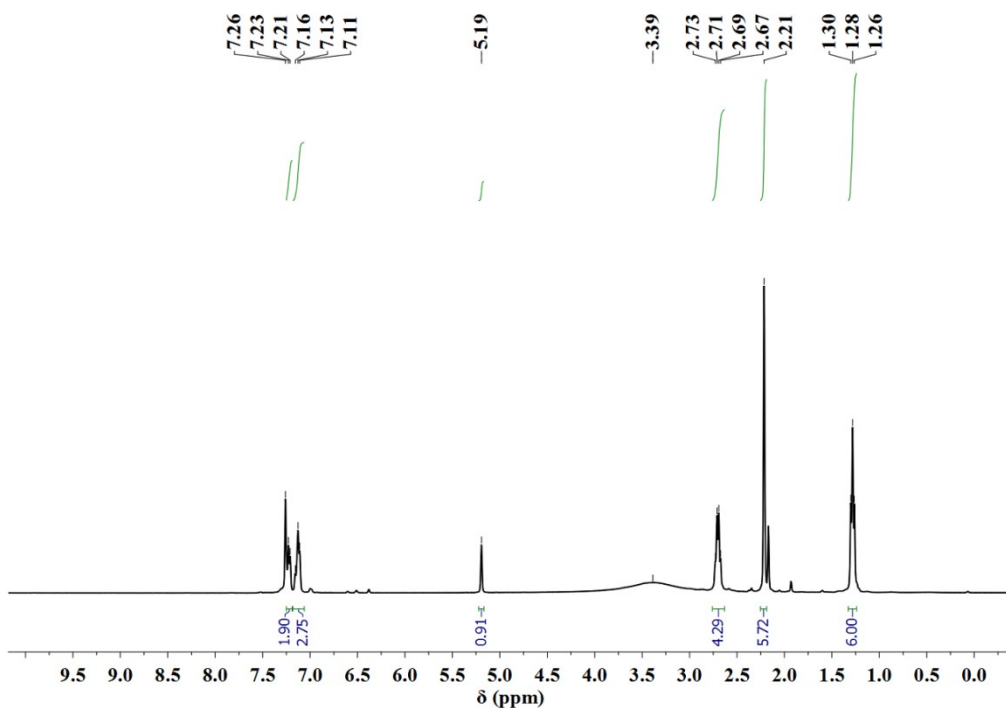

Figure S10.  $^1\text{H}$  NMR spectrum of L1 in  $\text{CDCl}_3$ .

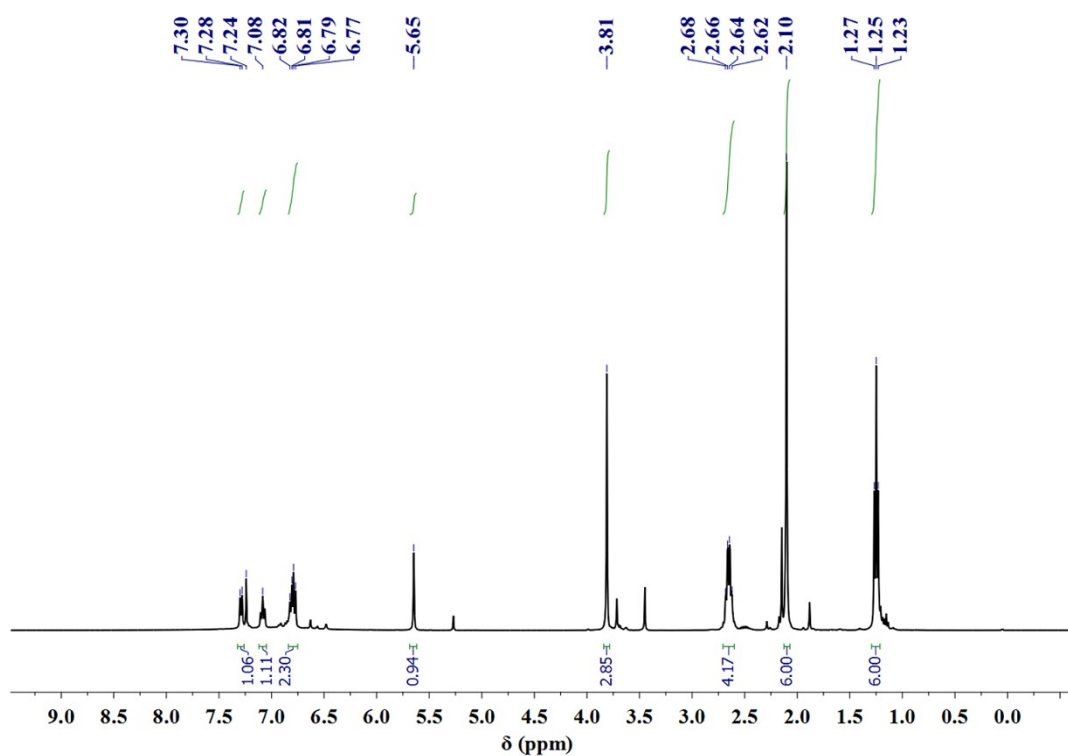

Figure S11.  $^1\text{H}$  NMR spectrum of L2 in  $\text{CDCl}_3$ .

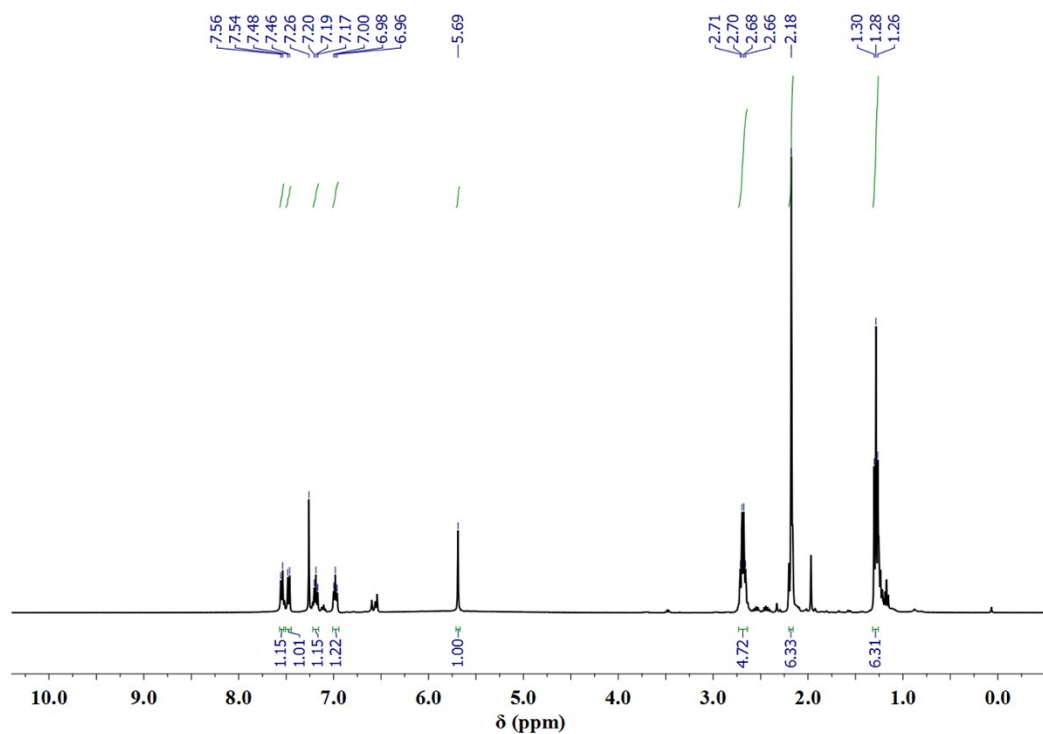

Figure S12.  $^1\text{H}$  NMR spectrum of L3 in  $\text{CDCl}_3$ .

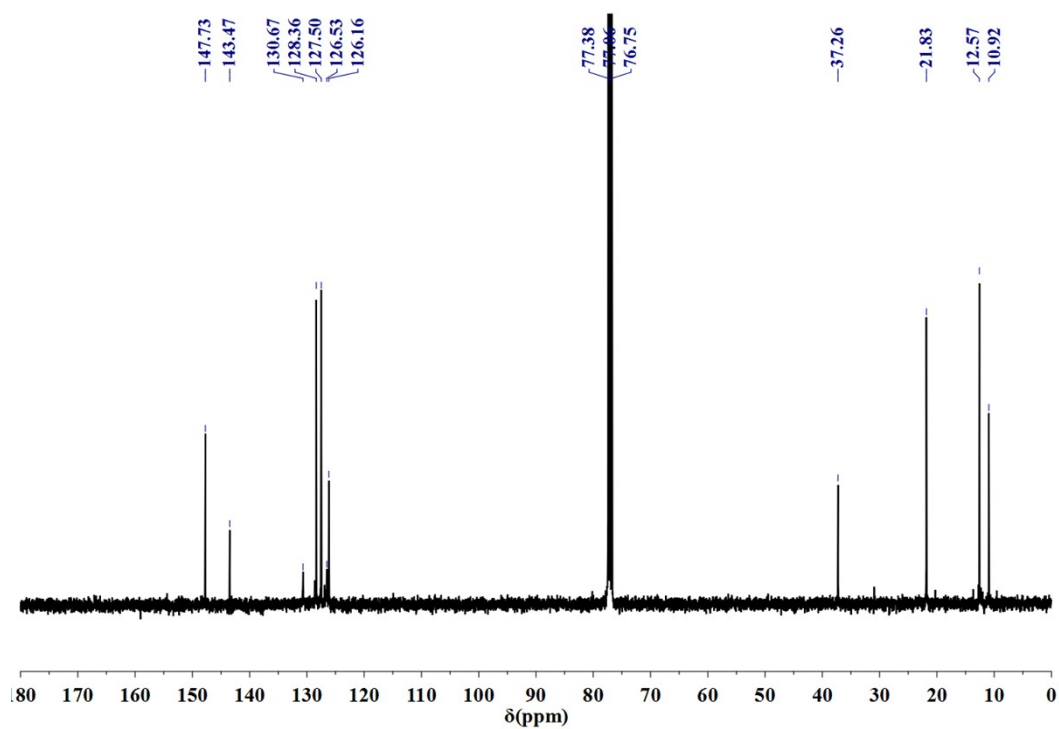

Figure S13.  $^{13}\text{C}$  NMR spectrum of L1 in  $\text{CDCl}_3$ .

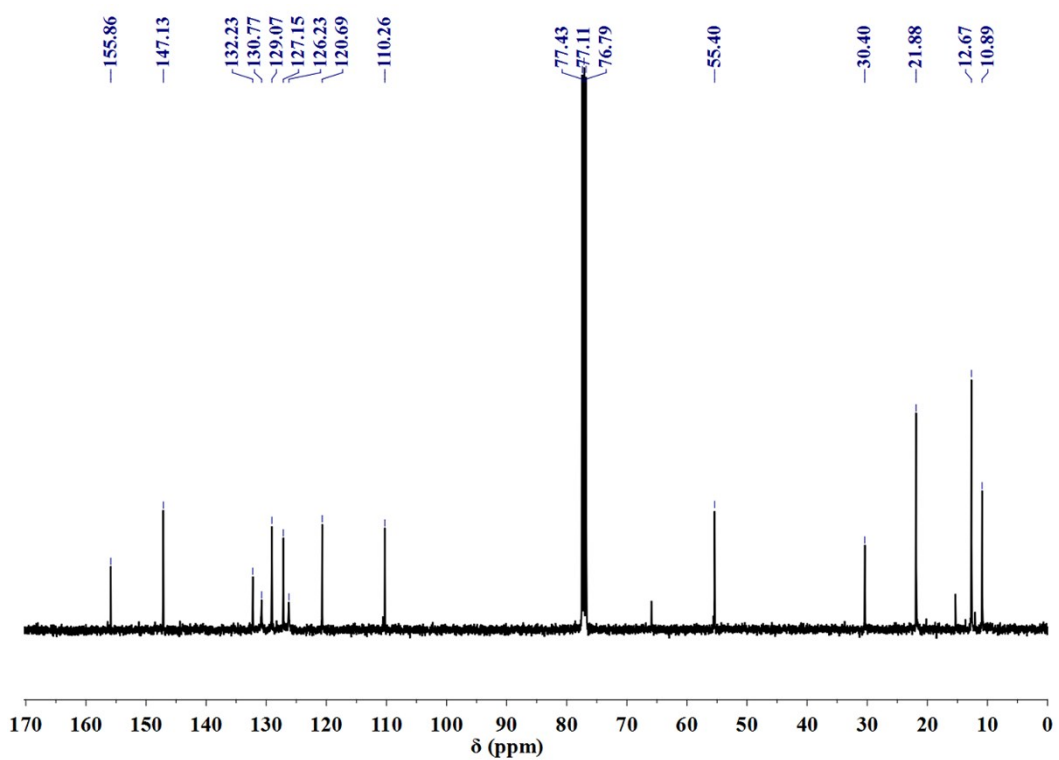

Figure S14.  $^{13}\text{C}$  NMR spectrum of L2 in  $\text{CDCl}_3$ .

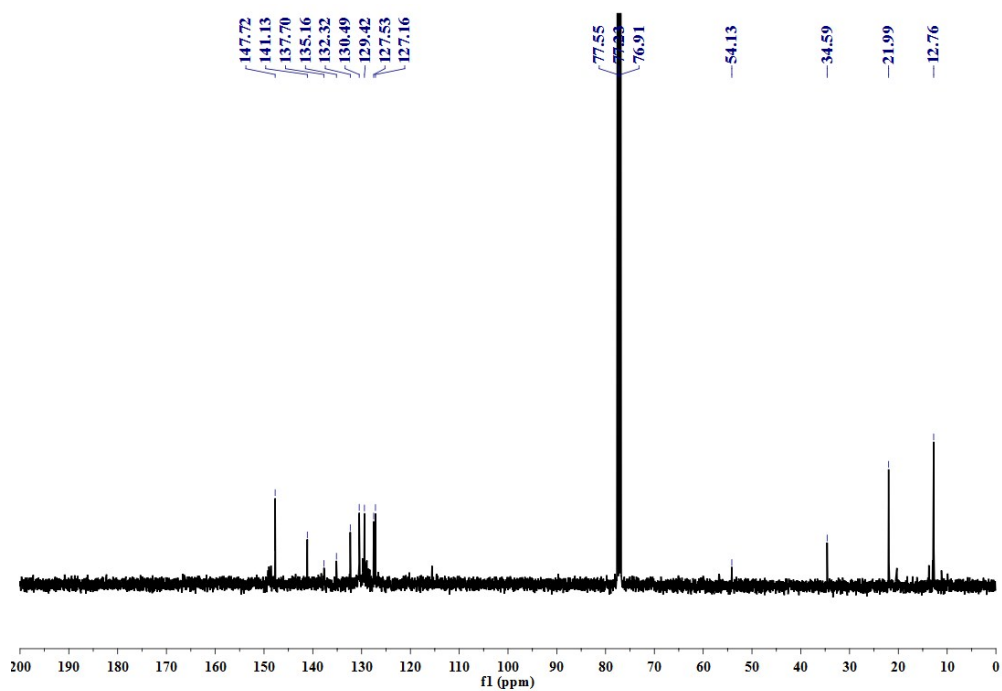

Figure S15. <sup>13</sup>C NMR spectrum of L3 in CDCl<sub>3</sub>.

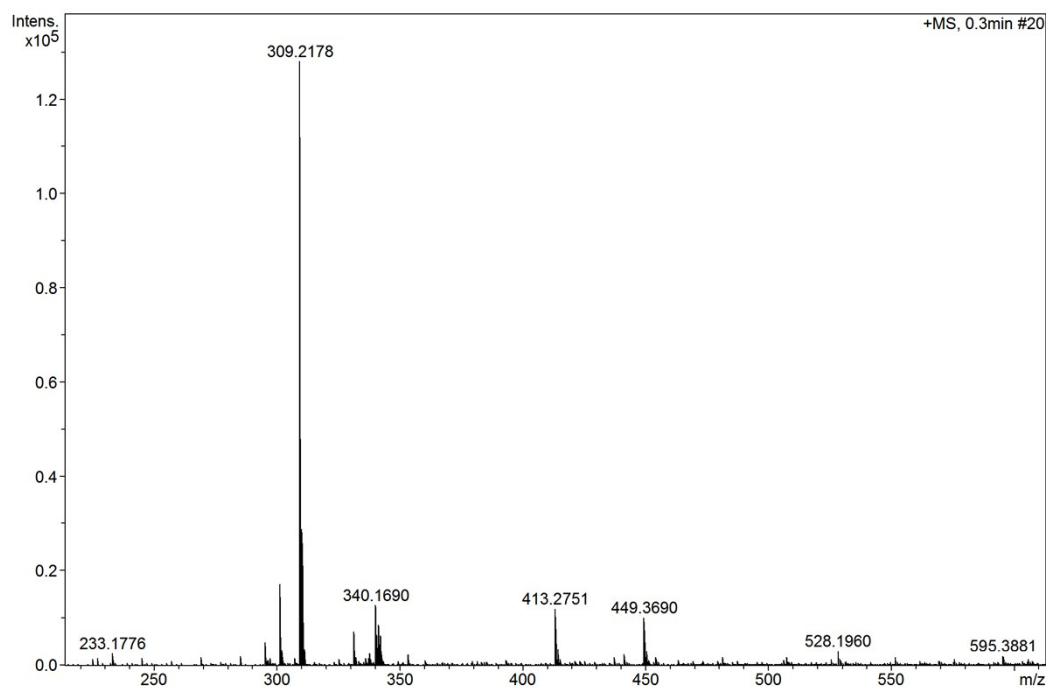

Figure S16. ESI-mass spectrum of L1 in methanol.

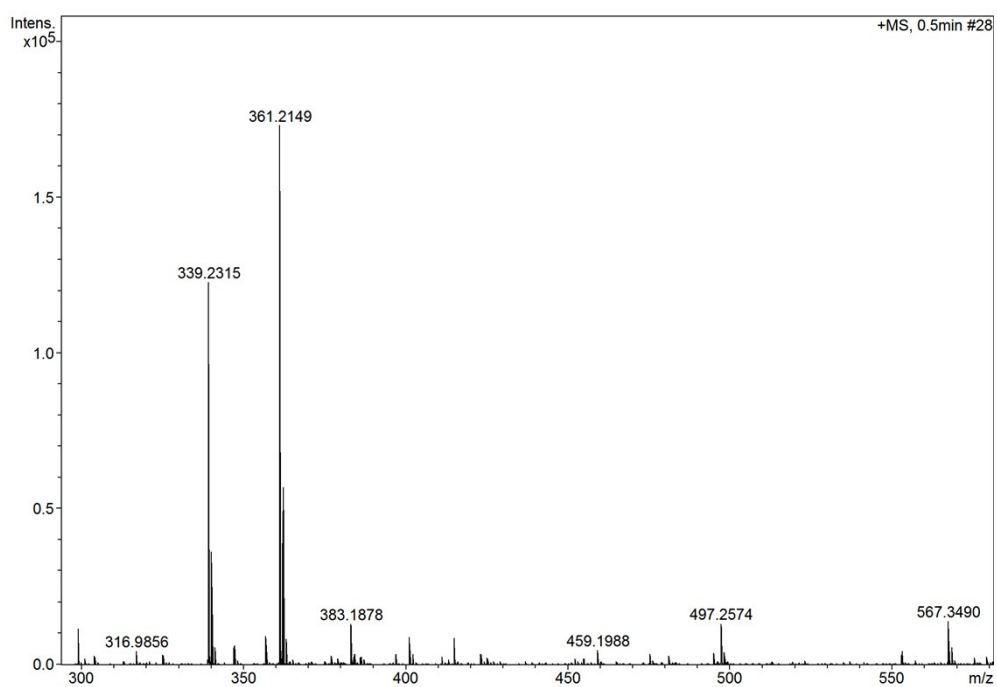

**Figure S17.** ESI-mass spectrum of **L2** in methanol.

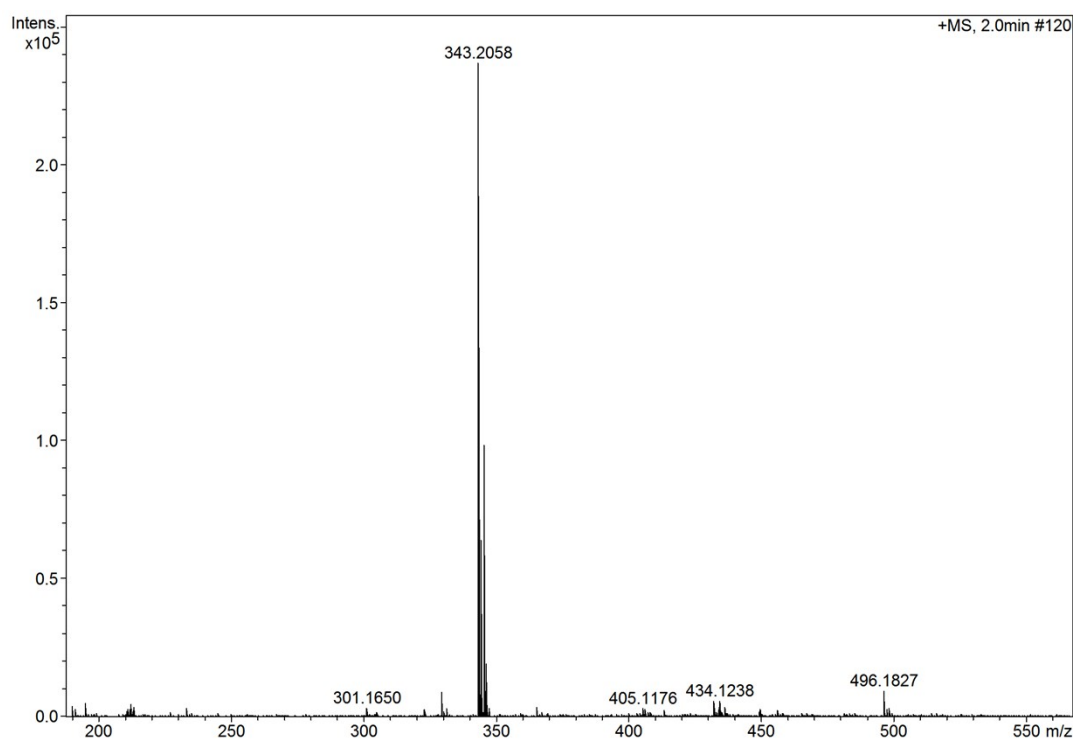

**Figure S18.** ESI-mass spectrum of **L3** in methanol.

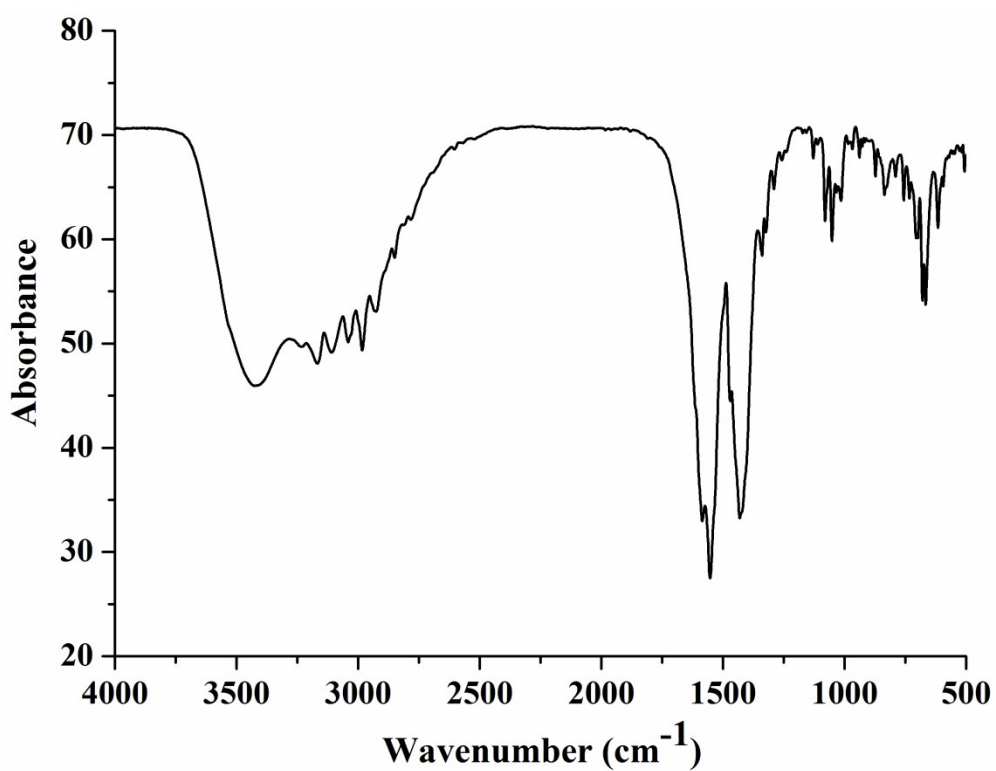

**Figure S19.** FT-IR spectrum of [Mn]-1 in KBr pellet.

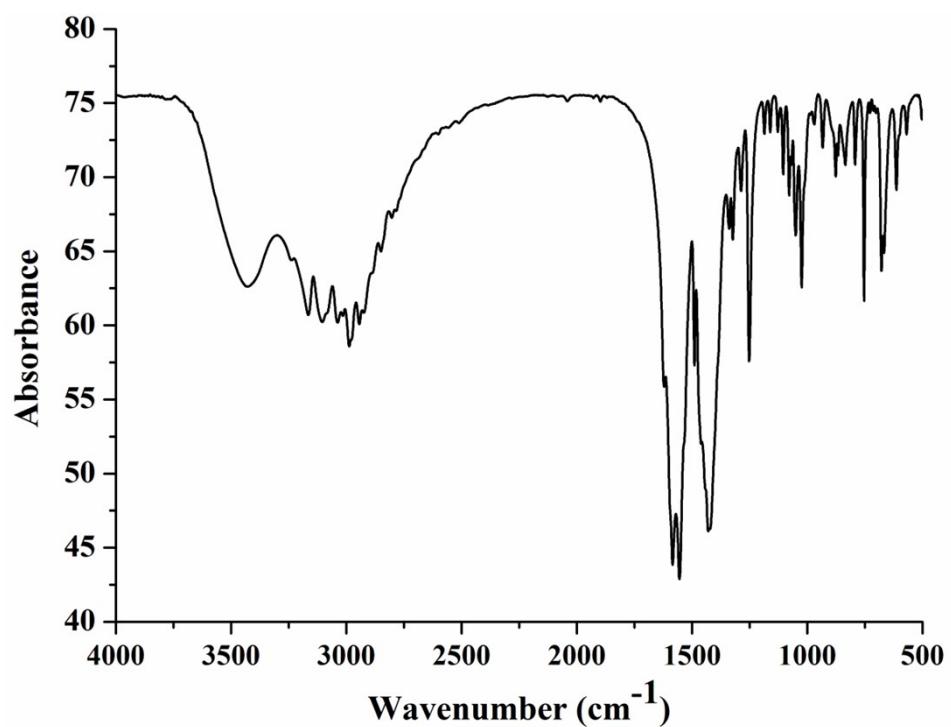

**Figure S20.** FT-IR spectrum of [Mn]-2 in KBr pellet.

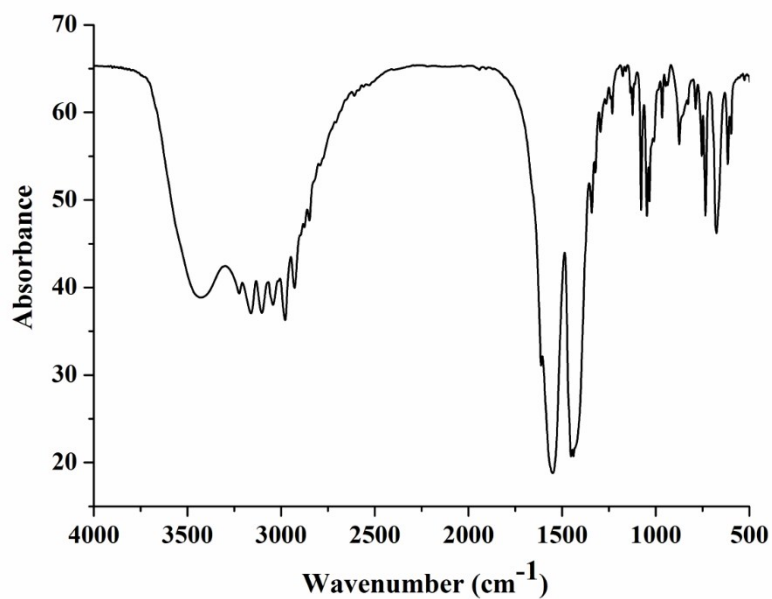

**Figure S21.** FT-IR spectrum of [Mn]-3 in KBr pellet.

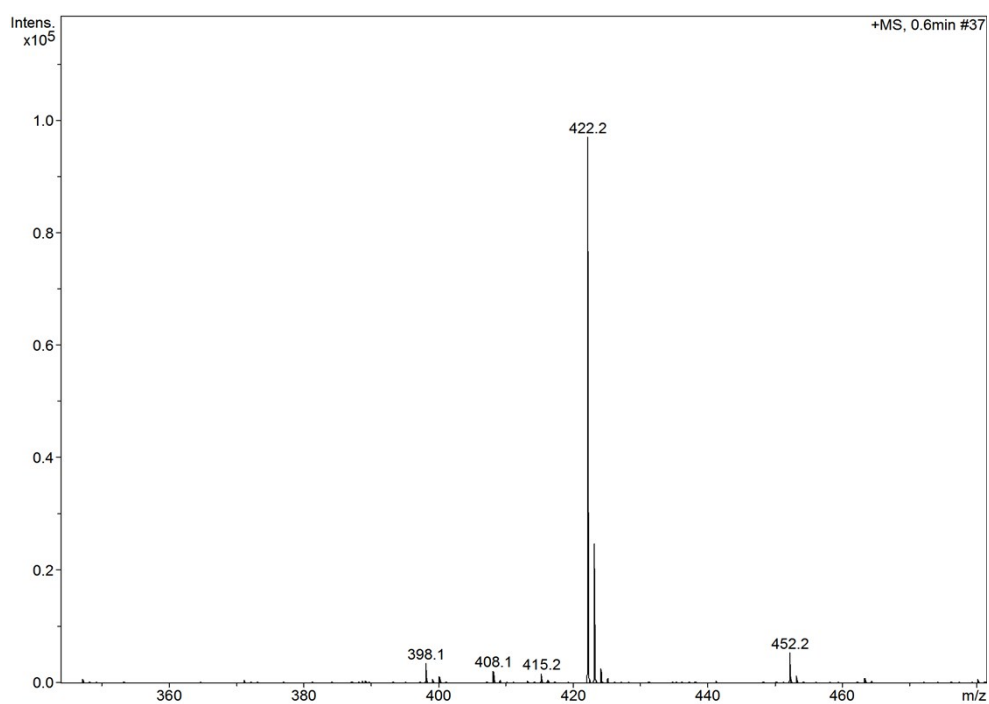

**Figure S22.** ESI-mass spectrum of [Mn]-1 in methanol.

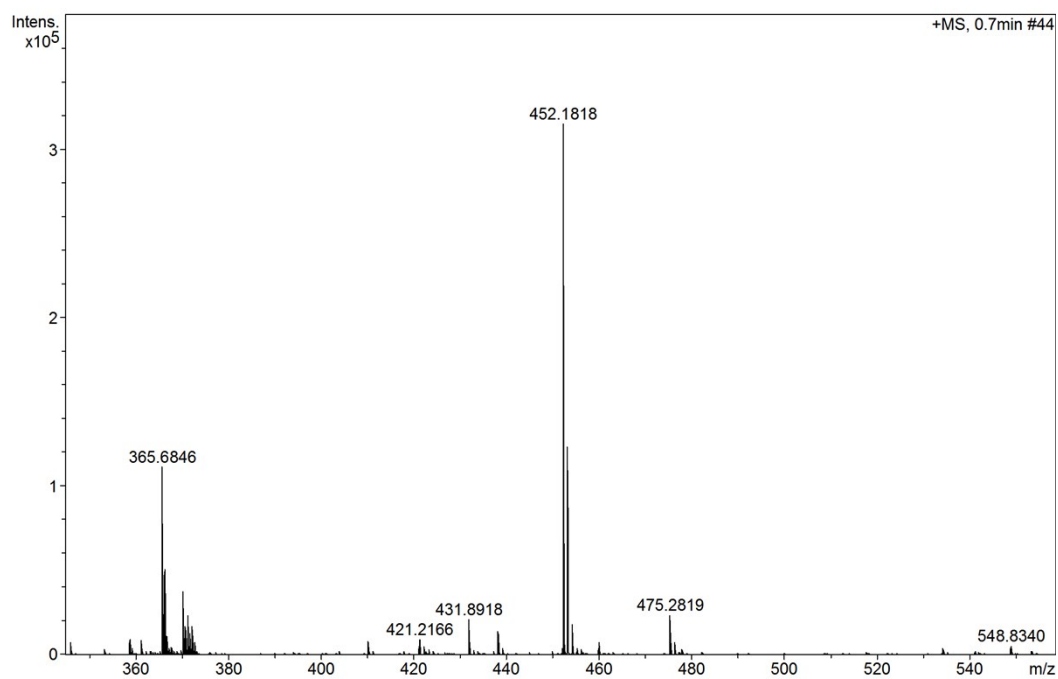

Figure S23. ESI-mass spectrum of [Mn]-2 in methanol.

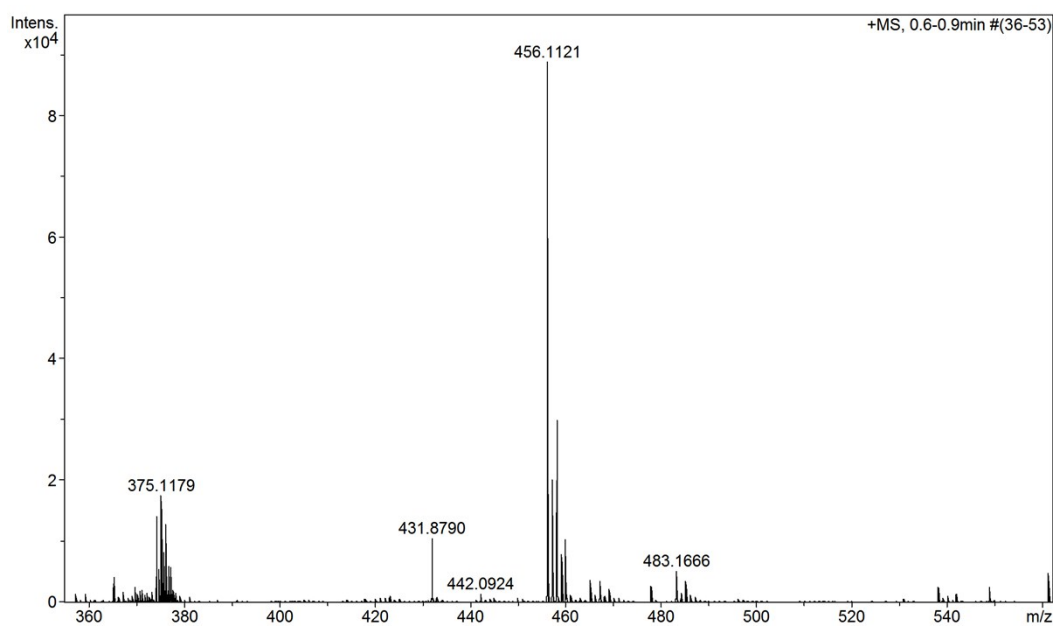

Figure S24. ESI-mass spectrum of [Mn]-3 in methanol.



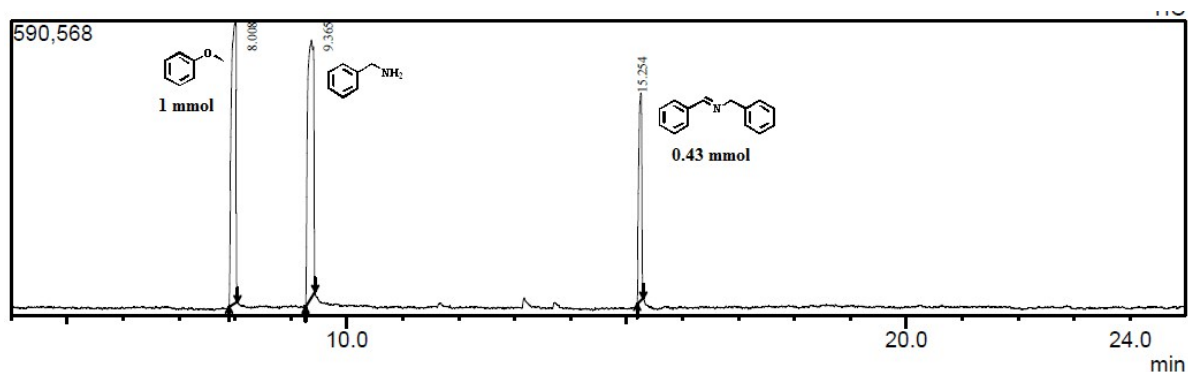

Peak Report TIC

| Peak# | R.Time | Area    | Area%  | Height  | Height% | A/H  | Name                                     |
|-------|--------|---------|--------|---------|---------|------|------------------------------------------|
| 1     | 8.008  | 3370288 | 38.56  | 564756  | 37.78   | 5.97 | Anisole                                  |
| 2     | 9.365  | 3848502 | 44.03  | 515031  | 34.45   | 7.47 | Benzylamine                              |
| 3     | 15.254 | 1521863 | 17.41  | 415105  | 27.77   | 3.67 | Benzenemethanamine, N-(phenylmethylene)- |
|       |        | 8740653 | 100.00 | 1494892 | 100.00  |      |                                          |

Line#:3 R.Time:15.255(Scan#:2252)

MassPeaks:308

RawMode:Averaged 15.250-15.260(2251-2253) BasePeak:91(129580)

BG Mode:Calc. from Peak Group 1 - Event 1 Scan

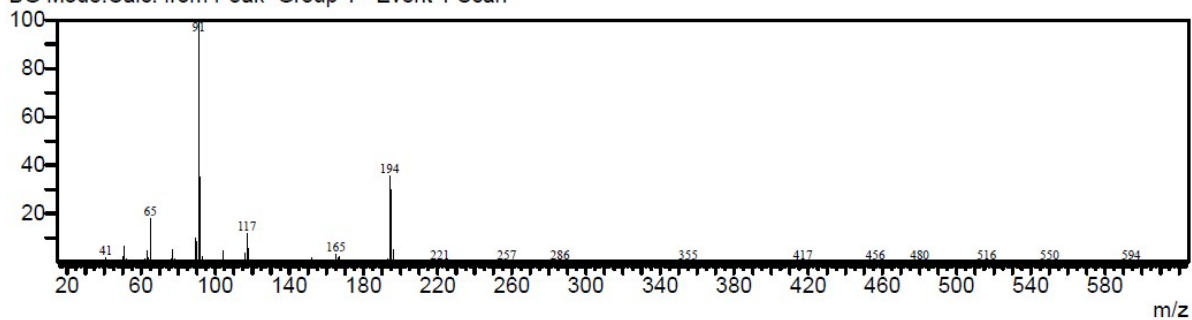

Figure S25. GC-MS for entry 1 of table 1.

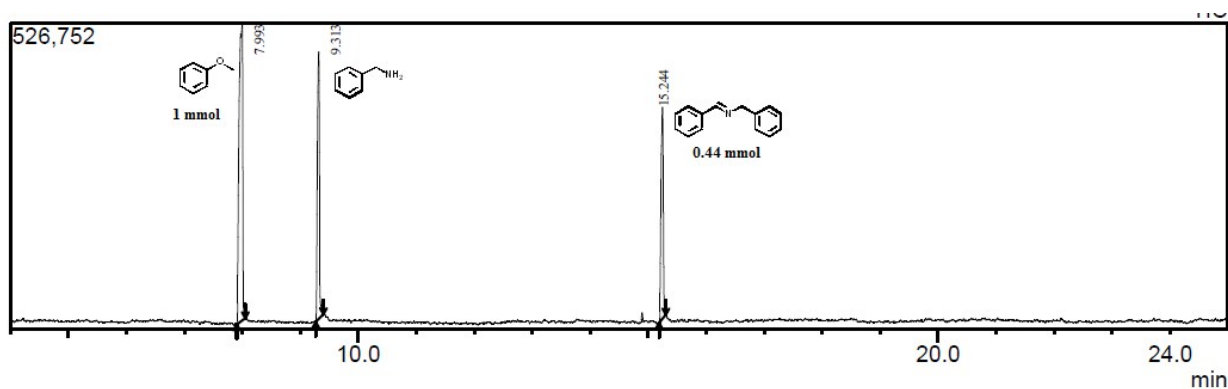

Peak Report TIC

| Peak# | R.Time | Area    | Area%  | Height  | Height% | A/H  | Name                                     |
|-------|--------|---------|--------|---------|---------|------|------------------------------------------|
| 1     | 7.993  | 2149273 | 51.00  | 511712  | 38.33   | 4.20 | Anisole                                  |
| 2     | 9.313  | 1118631 | 26.55  | 459559  | 34.43   | 2.43 | Benzylamine                              |
| 3     | 15.244 | 946022  | 22.45  | 363664  | 27.24   | 2.60 | Benzenemethanamine, N-(phenylmethylene)- |
|       |        | 4213926 | 100.00 | 1334935 | 100.00  |      |                                          |

Figure S26. GC-MS for entry 2 of table 1.

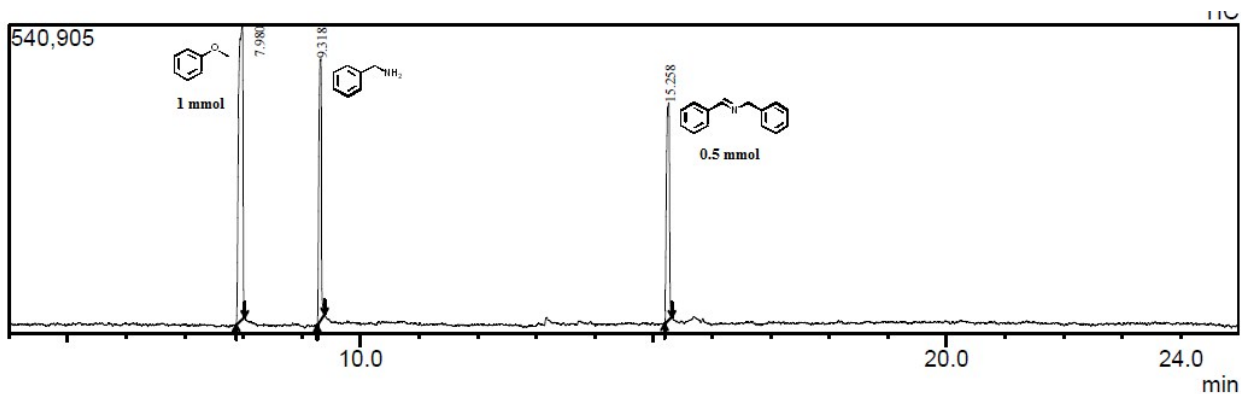

Peak Report TIC

| Peak# | R.Time | Area    | Area%  | Height  | Height% | A/H  | Name                                     |
|-------|--------|---------|--------|---------|---------|------|------------------------------------------|
| 1     | 7.980  | 2631633 | 49.31  | 515312  | 38.08   | 5.11 | Anisole                                  |
| 2     | 9.318  | 1386012 | 25.97  | 457271  | 33.79   | 3.03 | Benzylamine                              |
| 3     | 15.258 | 1319630 | 24.72  | 380572  | 28.12   | 3.47 | Benzenemethanamine, N-(phenylmethylene)- |
|       |        | 5337275 | 100.00 | 1353155 | 100.00  |      |                                          |

**Figure S27.** GC-MS for entry 3 of table 1.

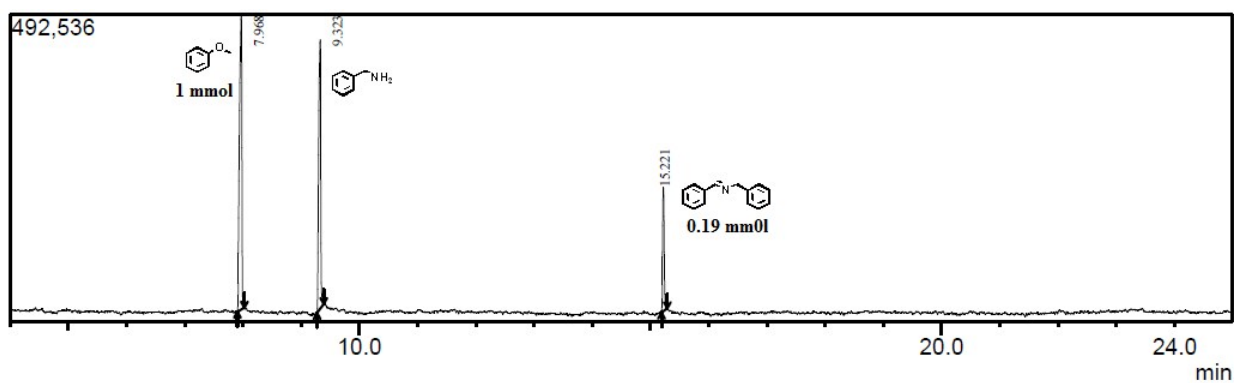

Peak Report TIC

| Peak# | R.Time | Area    | Area%  | Height  | Height% | A/H  | Name                                     |
|-------|--------|---------|--------|---------|---------|------|------------------------------------------|
| 1     | 7.968  | 1339667 | 50.34  | 472608  | 42.90   | 2.83 | Anisole                                  |
| 2     | 9.323  | 1120622 | 39.60  | 430797  | 39.10   | 2.60 | Benzylamine                              |
| 3     | 15.221 | 369349  | 10.05  | 198321  | 18.00   | 1.86 | Benzenemethanamine, N-(phenylmethylene)- |
|       |        | 2829638 | 100.00 | 1101726 | 100.00  |      |                                          |

**Figure S28.** GC-MS for entry 4 of table 1.

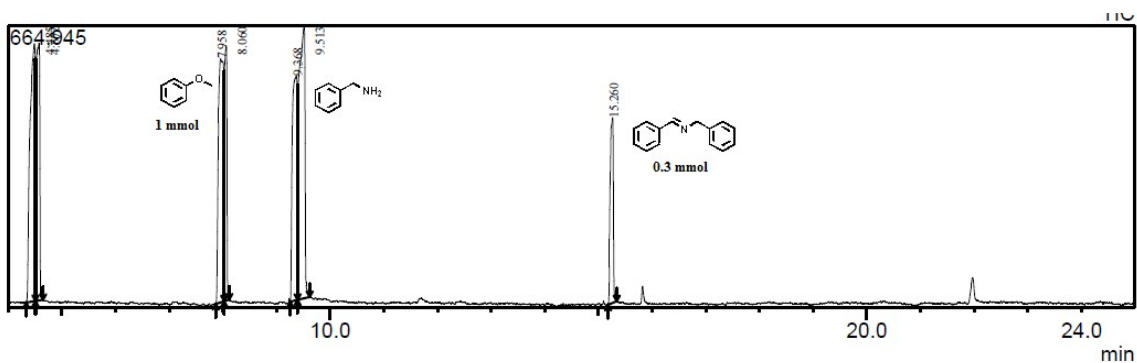

Peak Report TIC

| Peak# | R.Time | Area     | Area%  | Height  | Height% | A/H  | Name                                     |
|-------|--------|----------|--------|---------|---------|------|------------------------------------------|
| 1     | 4.485  | 4097302  | 17.84  | 606808  | 15.19   | 6.75 | Toluene                                  |
| 2     | 4.572  | 2947741  | 12.84  | 606441  | 15.18   | 4.86 | Toluene                                  |
| 3     | 7.958  | 3966564  | 17.27  | 573962  | 14.37   | 6.91 | Anisole                                  |
| 4     | 8.060  | 1893529  | 8.25   | 600514  | 15.03   | 3.15 | Anisole                                  |
| 5     | 9.368  | 3437438  | 14.97  | 528561  | 13.23   | 6.50 | Benzylamine                              |
| 6     | 9.513  | 4889465  | 21.29  | 642594  | 16.08   | 7.61 | Benzylamine                              |
| 7     | 15.260 | 1732596  | 7.54   | 436289  | 10.92   | 3.97 | Benzenemethanamine, N-(phenylmethylene)- |
|       |        | 22964635 | 100.00 | 3995169 | 100.00  |      |                                          |

Figure S29. GC-MS for entry 5 of table 1.

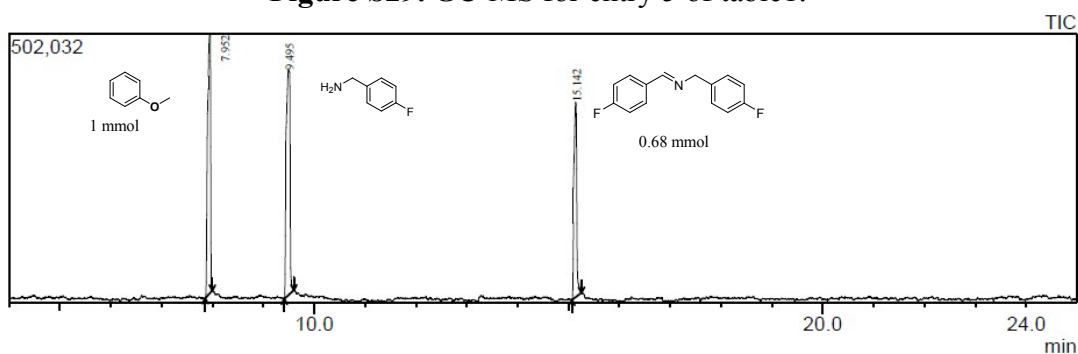

Peak Report TIC

| Peak# | R.Time | Area    | Area%  | Height  | Height% | A/H  | Name                                             |
|-------|--------|---------|--------|---------|---------|------|--------------------------------------------------|
| 1     | 7.952  | 2038162 | 36.07  | 483315  | 38.09   | 4.22 | Anisole                                          |
| 2     | 9.495  | 2214996 | 39.20  | 420976  | 33.18   | 5.26 | Benzenemethanamine, 4-fluoro-                    |
| 3     | 15.142 | 1397085 | 24.73  | 364527  | 28.73   | 3.83 | 4-fluoro-benzenemethanamine, N-(4-fluorophenyl)- |
|       |        | 5650243 | 100.00 | 1268818 | 100.00  |      |                                                  |

Line#:3 R.Time:15.140(Scan#:2229)

MassPeaks:364

RawMode:Averaged 15.135-15.145(2228-2230) BasePeak:109(152130)

BG Mode:Calc. from Peak Group 1 - Event 1 Scan

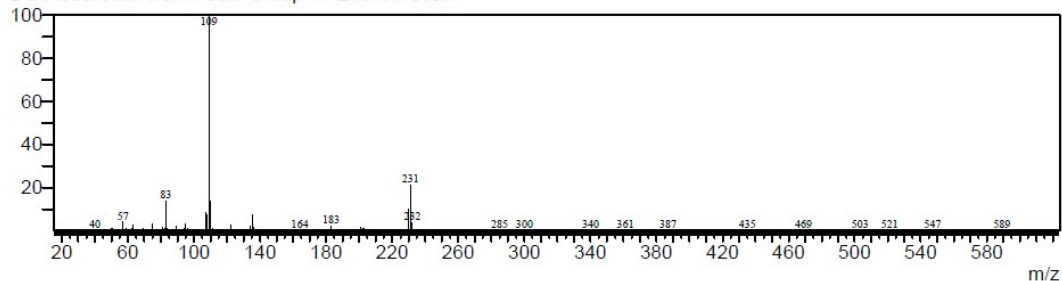

Figure S30. GC-MS for 2b.

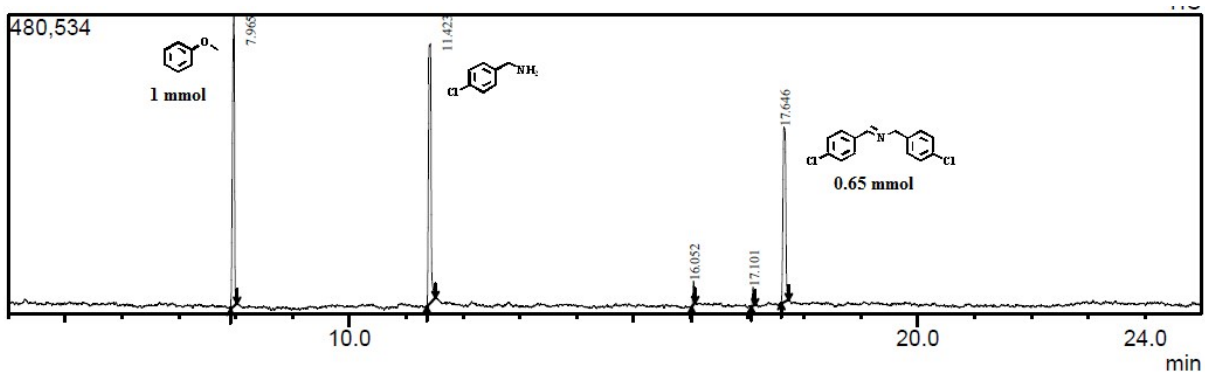

Peak Report TIC

| Peak# | R.Time | Area    | Area%  | Height  | Height% | A/H  | Name                                             |
|-------|--------|---------|--------|---------|---------|------|--------------------------------------------------|
| 1     | 7.965  | 1134986 | 32.14  | 467878  | 37.95   | 2.43 | Anisole                                          |
| 2     | 11.423 | 1379599 | 30.05  | 416382  | 33.78   | 3.31 | Benzenemethanamine, 3-chloro-                    |
| 3     | 16.052 | 58112   | 1.65   | 38012   | 3.08    | 1.53 | Hexadecanoic acid, methyl ester                  |
| 4     | 17.101 | 43896   | 1.24   | 29562   | 2.40    | 1.48 | Methyl stearate                                  |
| 5     | 17.646 | 915129  | 20.91  | 280930  | 22.79   | 3.26 | 4-Chloro-benzenemethanamine, N-(4-chloro-phenyl) |
|       |        | 3531722 | 100.00 | 1232764 | 100.00  |      |                                                  |

Line#:5 R.Time:17.645(Scan#:2730)

MassPeaks:335

RawMode:Averaged 17.640-17.650(2729-2731) BasePeak:125(83603)

BG Mode:Calc. from Peak Group 1 - Event 1 Scan

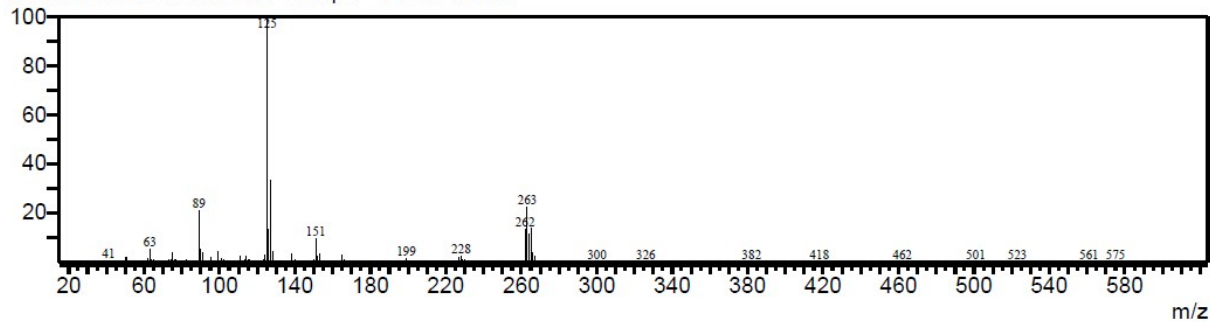

Figure S31. GC-MS for 2c.

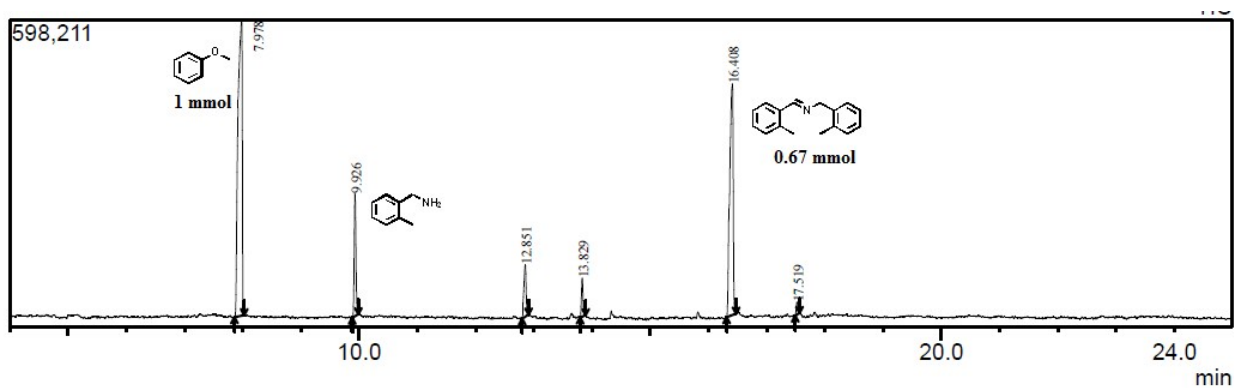

Peak Report TIC

| Peak# | R.Time | Area    | Area%  | Height  | Height% | A/H  | Name                                          |
|-------|--------|---------|--------|---------|---------|------|-----------------------------------------------|
| 1     | 7.978  | 2898033 | 50.64  | 575974  | 39.36   | 5.03 | Anisole                                       |
| 2     | 9.926  | 464986  | 8.13   | 238440  | 16.30   | 1.95 | Benzaldehyde, 2-methyl-                       |
| 3     | 12.851 | 262294  | 4.58   | 100606  | 6.88    | 2.61 | Benzamide, 2-methyl-                          |
| 4     | 13.829 | 139270  | 2.43   | 74572   | 5.10    | 1.87 | Acetamide, N-(2-phenylethyl)-                 |
| 5     | 16.408 | 1910122 | 33.38  | 449658  | 30.73   | 4.25 | 2-Methyl-benzenemethanamine, N-(2-methyl-phen |
| 6     | 17.519 | 48001   | 0.84   | 23967   | 1.64    | 2.00 | Benzeneethanamine, N-benzoyl-                 |
|       |        | 5722706 | 100.00 | 1463217 | 100.00  |      |                                               |

Line#:5 R.Time:16.410(Scan#:2483)

MassPeaks:343

RawMode:Averaged 16.405-16.415(2482-2484) BasePeak:105(89042)

BG Mode:Calc. from Peak Group 1 - Event 1 Scan

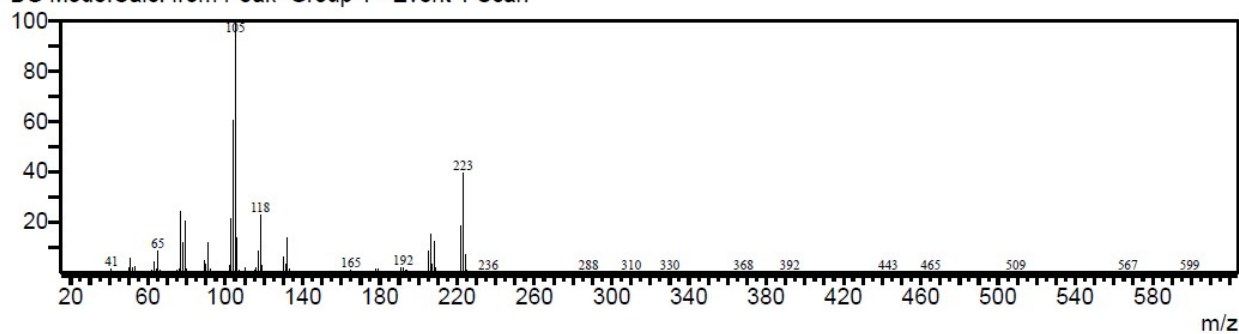

Figure S32. GC-MS for 2d.

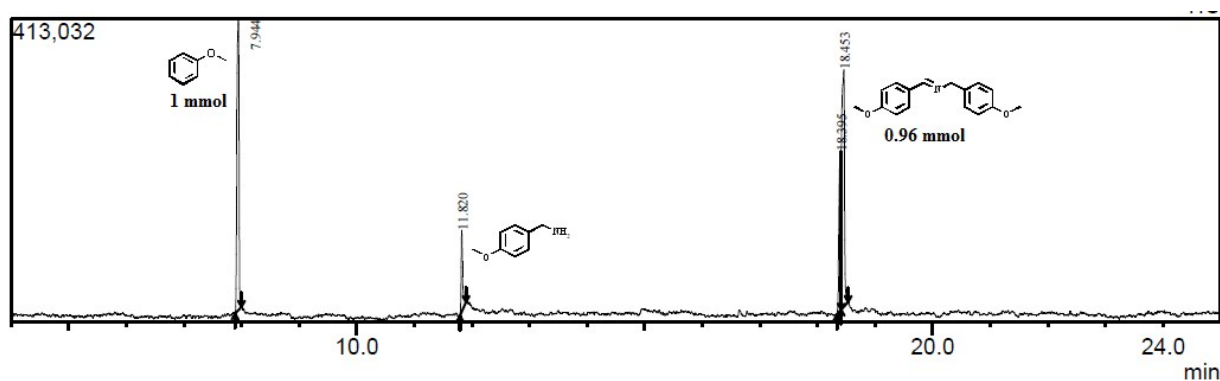

Peak Report TIC

| Peak# | R.Time | Area    | Area%  | Height  | Height% | A/H  | Name                                                      |
|-------|--------|---------|--------|---------|---------|------|-----------------------------------------------------------|
| 1     | 7.944  | 1062736 | 37.15  | 396510  | 37.87   | 2.58 | Anisole                                                   |
| 2     | 11.820 | 202455  | 7.09   | 110937  | 10.60   | 1.82 | 3-Methoxybenzylamine                                      |
| 3     | 18.395 | 570371  | 19.97  | 216678  | 20.70   | 2.63 | Benzene, (3-iodo-1-methoxybutyl)-                         |
| 4     | 18.453 | 1021230 | 35.80  | 322808  | 30.83   | 3.29 | Benzenemethanamine, 4-methoxy-N-[(4-methoxy)phenyl]butyl- |
|       |        | 2856792 | 100.00 | 1046933 | 100.00  |      |                                                           |

Line#:4 R.Time:18.455(Scan#:2892)

MassPeaks:373

RawMode:Averaged 18.450-18.460(2891-2893) BasePeak:121(86612)

BG Mode:Calc. from Peak Group 1 - Event 1 Scan

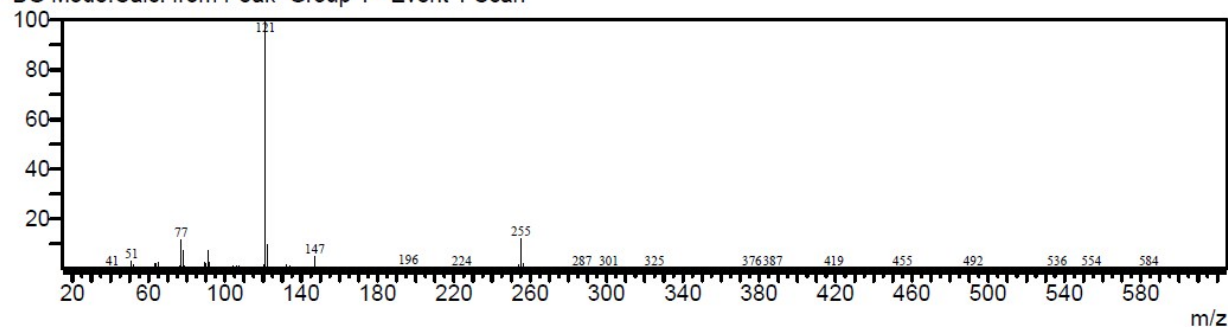

Figure S33. GC-MS for 2e.

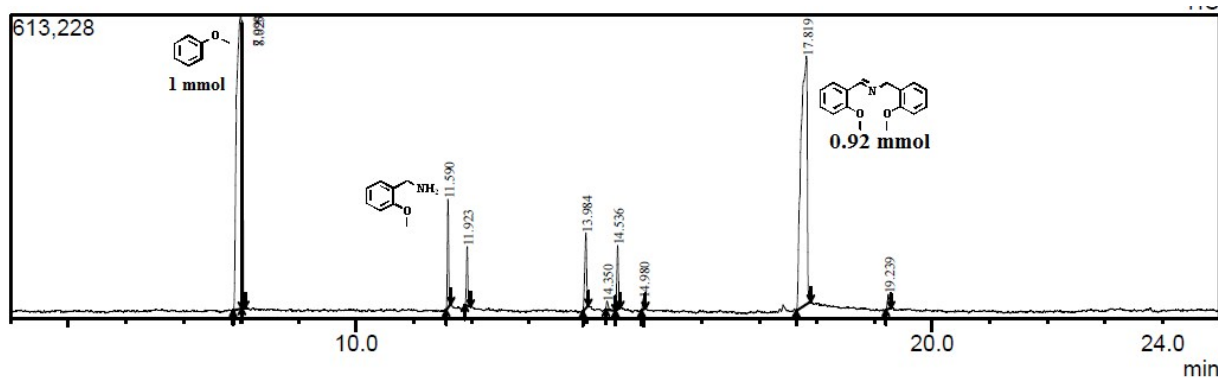

Peak Report TIC

| Peak# | R.Time | Area    | Area%  | Height  | Height% | A/H  | Name                                        |
|-------|--------|---------|--------|---------|---------|------|---------------------------------------------|
| 1     | 7.990  | 3879809 | 40.63  | 592556  | 25.15   | 6.04 | Anisole                                     |
| 2     | 8.025  | 867488  | 9.12   | 577049  | 24.49   | 1.50 | Anisole                                     |
| 3     | 11.590 | 333851  | 3.51   | 218903  | 9.29    | 1.53 | 2-Methoxybenzylamine                        |
| 4     | 11.923 | 200655  | 2.11   | 118635  | 5.03    | 1.69 | o-Methoxybenzitrile                         |
| 5     | 13.984 | 330993  | 3.48   | 152350  | 6.47    | 2.17 | 2-Methoxybenzamide                          |
| 6     | 14.350 | 34012   | 0.36   | 16145   | 0.69    | 2.11 | 2-Methoxybenzylamine                        |
| 7     | 14.536 | 240995  | 2.53   | 128926  | 5.47    | 1.87 | 2-Methoxybenzylamine, N-acetyl-             |
| 8     | 14.980 | 41307   | 0.43   | 21972   | 0.93    | 1.88 | 2-Methoxybenzylamine                        |
| 9     | 17.819 | 3514568 | 37.10  | 500387  | 21.24   | 7.62 | 2-Methoxy-Benzenemethanamine, N-(2-methoxy) |
| 10    | 19.239 | 70046   | 0.74   | 29315   | 1.24    | 2.39 | Benzaldehyde, 4-methoxy-                    |
|       |        | 9513724 | 100.00 | 2356238 | 100.00  |      |                                             |

Line#:9 R.Time:17.820(Scan#:2765)

MassPeaks:359

RawMode:Averaged 17.815-17.825(2764-2766) BasePeak:91(86569)

BG Mode:Calc. from Peak Group 1 - Event 1 Scan

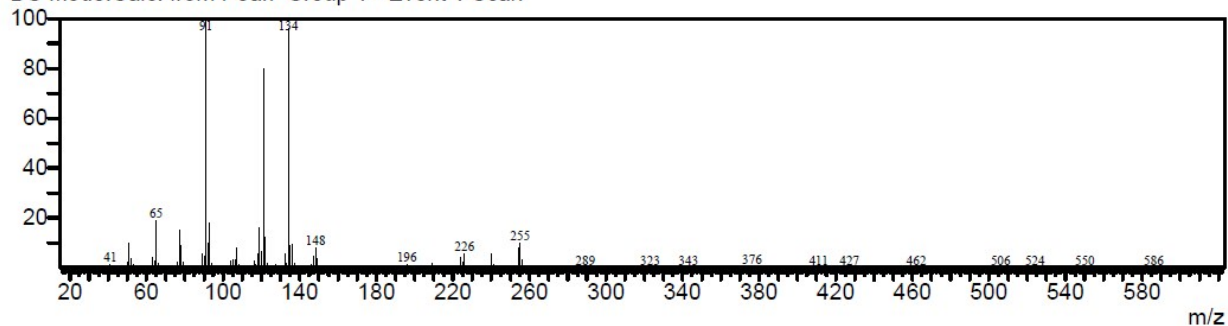

Figure S34. GC-MS for 2f.

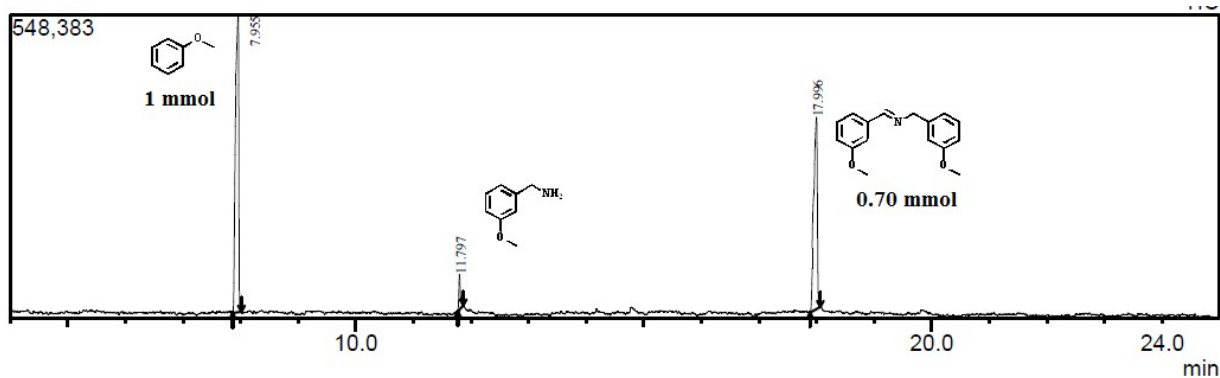

Peak Report TIC

| Peak# | R. Time | Area    | Area%  | Height | Height% | A/H  | Name                                          |
|-------|---------|---------|--------|--------|---------|------|-----------------------------------------------|
| 1     | 7.955   | 2144263 | 56.95  | 539324 | 56.69   | 3.98 | Anisole                                       |
| 2     | 11.797  | 119206  | 3.17   | 63964  | 6.72    | 1.86 | 3-Methoxybenzylamine                          |
| 3     | 17.996  | 1501539 | 39.88  | 348030 | 36.58   | 4.31 | 3-Methoxy-benzenemethanamine, N-(3-methoxy-ph |
|       |         | 3765008 | 100.00 | 951318 | 100.00  |      |                                               |

Line#:3 R.Time:17.995(Scan#:2800)

MassPeaks:364

RawMode:Averaged 17.990-18.000(2799-2801) BasePeak:122(59586)

BG Mode:Calc. from Peak Group 1 - Event 1 Scan

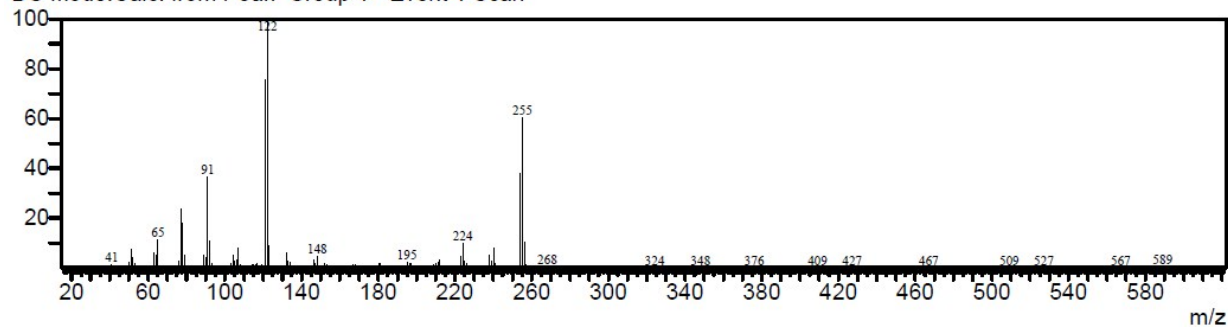

Figure S35. GC-MS for 2g.



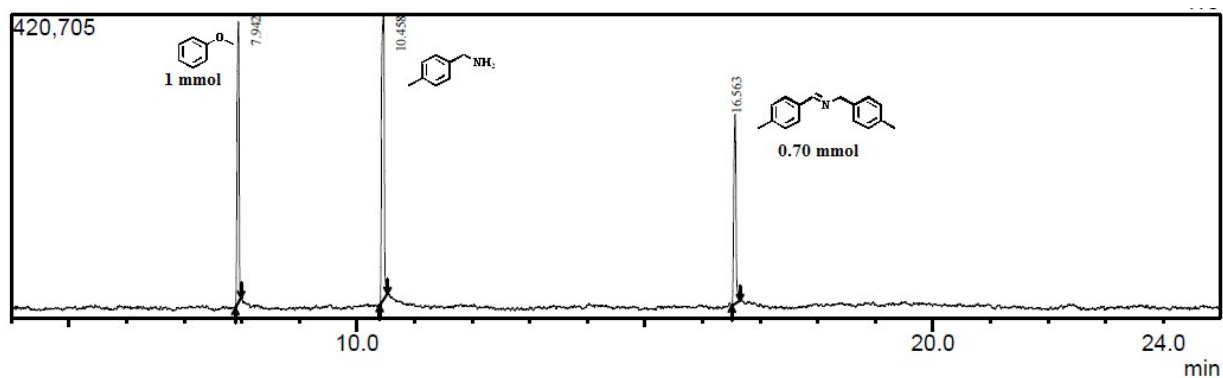

Peak Report TIC

| Peak# | R.Time | Area    | Area%  | Height  | Height% | A/H  | Name                                          |
|-------|--------|---------|--------|---------|---------|------|-----------------------------------------------|
| 1     | 7.942  | 962121  | 32.52  | 388306  | 37.15   | 2.48 | Anisole                                       |
| 2     | 10.458 | 1319416 | 44.60  | 394686  | 37.76   | 3.34 | Benzenemethanamine, 3-methyl-                 |
| 3     | 16.563 | 676689  | 22.87  | 262214  | 25.09   | 2.58 | 4-Methyl-benzenemethanamine, (N-4-methyl-phen |
|       |        | 2958226 | 100.00 | 1045206 | 100.00  |      |                                               |

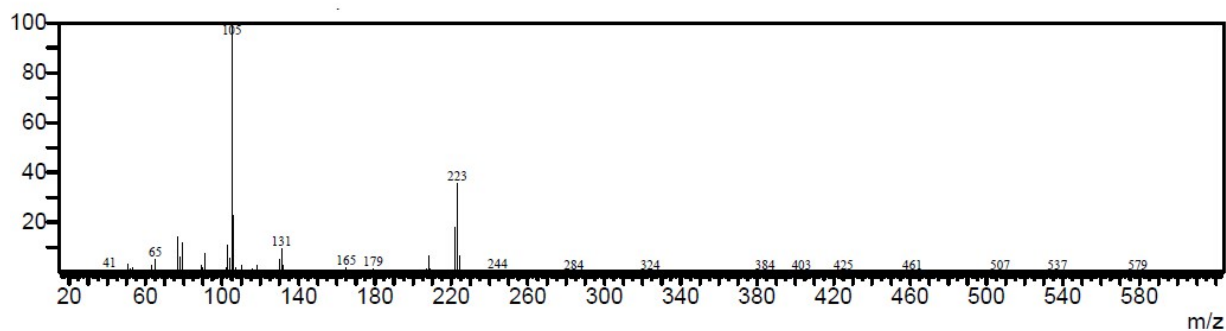

Figure S36. GC-MS for 2h.

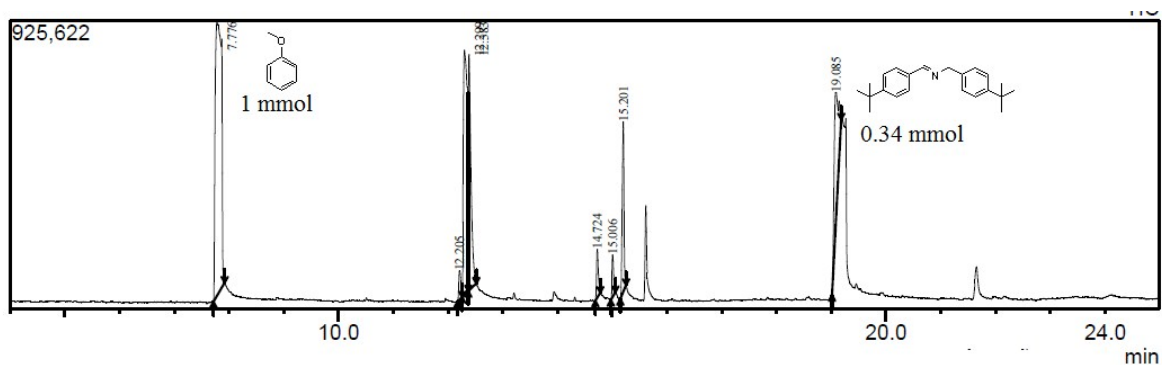

Peak Report TIC

| Peak# | R.Time | Area     | Area%  | Height  | Height% | A/H  | Name                                                                  |
|-------|--------|----------|--------|---------|---------|------|-----------------------------------------------------------------------|
| 1     | 7.776  | 6928931  | 38.77  | 883968  | 23.50   | 7.84 | Anisole                                                               |
| 2     | 12.205 | 229780   | 1.29   | 91813   | 2.44    | 2.50 | 4-t-Butylbenzotrile                                                   |
| 3     | 12.299 | 4025532  | 22.52  | 784086  | 20.84   | 5.13 | benzenamine, 4-(2-methylbutyl)-                                       |
| 4     | 12.383 | 2479627  | 13.87  | 755904  | 20.10   | 3.28 | Benzenamine, 4-(cyclopropylmethyl)-                                   |
| 5     | 14.724 | 343215   | 1.92   | 155984  | 4.15    | 2.20 | 4-t-Butylbenzamide                                                    |
| 6     | 15.006 | 275254   | 1.54   | 134292  | 3.57    | 2.05 | 3,4-Dihydrocoumarin, 7,8-dimethyl-                                    |
| 7     | 15.201 | 1300314  | 7.28   | 544827  | 14.48   | 2.39 | 4-tert-Butylbenzylamine, N-acetyl-                                    |
| 8     | 19.085 | 2290466  | 12.82  | 410696  | 10.92   | 5.58 | 4-(tert-butylbenzyl)-1-(4-(tert-butyl)phenyl)-N,N-dimethylbenzenamine |
|       |        | 17873119 | 100.00 | 3761570 | 100.00  |      |                                                                       |

Line#:8 R.Time:19.085(Scan#:3018)

MassPeaks:342

RawMode:Averaged 19.080-19.090(3017-3019) BasePeak:147(89990)

BG Mode:Calc. from Peak Group 1 - Event 1 Scan

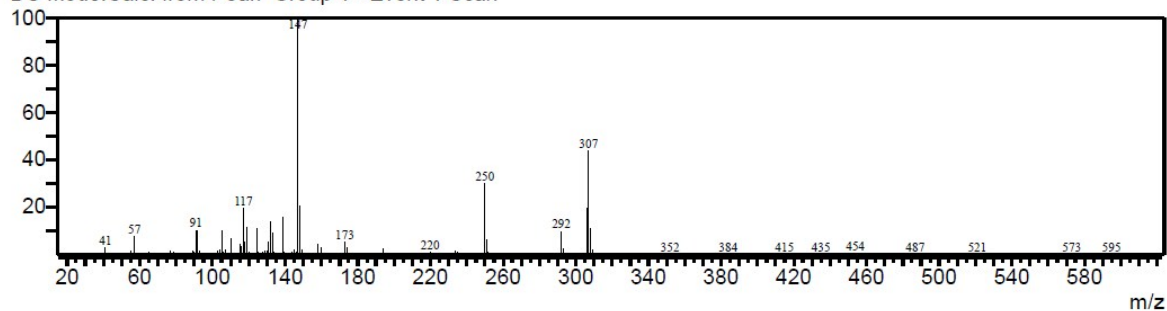

Figure S37. GC-MS for 2i.

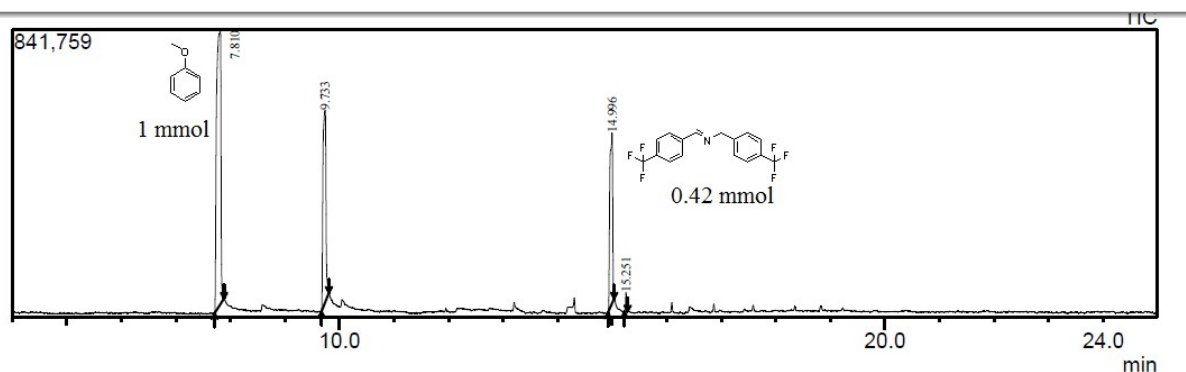

Peak Report TIC

| Peak# | R.Time | Area    | Area%  | Height  | Height% | A/H  | Name                                              |
|-------|--------|---------|--------|---------|---------|------|---------------------------------------------------|
| 1     | 7.810  | 4502289 | 52.65  | 803758  | 41.85   | 5.60 | Anisole                                           |
| 2     | 9.733  | 2104840 | 24.62  | 562242  | 29.27   | 3.74 | Benzenemethanamine, 3-(trifluoromethyl)-          |
| 3     | 14.996 | 1874426 | 21.92  | 498585  | 25.96   | 3.76 | Benzenecetic acid, 3-(trifluoromethyl)-           |
| 4     | 15.251 | 69294   | 0.81   | 56057   | 2.92    | 1.24 | 4-(trifluoromethyl)benzyl)-1-(4-(trifluoromethyl) |
|       |        | 8550849 | 100.00 | 1920642 | 100.00  |      |                                                   |

\_line#:3 R.Time:14.995(Scan#:2200)

MassPeaks:385

RawMode:Averaged 14.990-15.000(2199-2201) BasePeak:159(119599)

3G Mode:Calc. from Peak Group 1 - Event 1 Scan

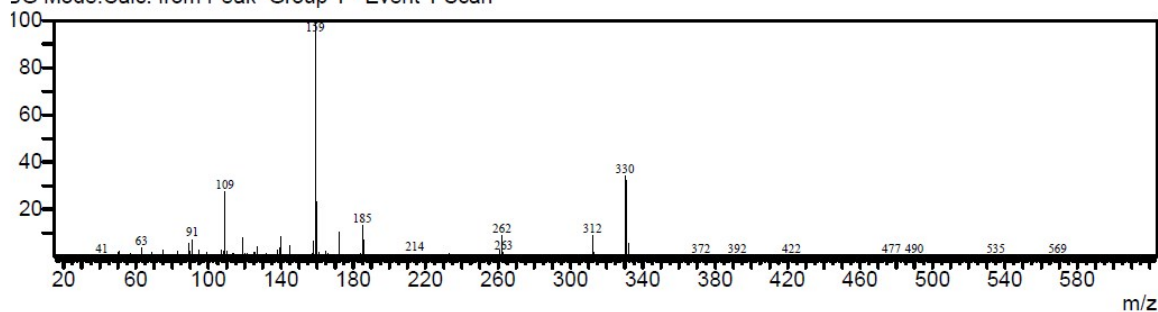

**Figure S38.** GC-MS for **2j**.

**Table S1.** Crystallographic data for complexes **[Mn]-1** and **[Mn]-2**.

|                  | <b>[Mn]-1</b>                                                   | <b>[Mn]-2</b>                                                   |
|------------------|-----------------------------------------------------------------|-----------------------------------------------------------------|
| Formulae         | C <sub>23</sub> H <sub>30</sub> MnN <sub>4</sub> O <sub>4</sub> | C <sub>24</sub> H <sub>32</sub> MnN <sub>4</sub> O <sub>5</sub> |
| Molecular weight | 481.45                                                          | 511.47                                                          |
| Crystal system   | Triclinic                                                       | Triclinic                                                       |
| Space group      | P-1                                                             | P-1                                                             |
| Temperature/K    | 293                                                             | 293                                                             |
| Wavelength       | 0.71073                                                         | 0.71073                                                         |
| <i>a</i> /Å      | 8.8681(13)                                                      | 9.1830(5)                                                       |
| <i>b</i> /Å      | 9.0206(14)                                                      | 9.2736(5)                                                       |
| <i>c</i> /Å      | 16.558(2)                                                       | 16.6245(10)                                                     |
| $\alpha$ /°      | 79.765(13)                                                      | 82.388(5)                                                       |

|                                |                                       |                                       |
|--------------------------------|---------------------------------------|---------------------------------------|
| $\beta/^\circ$                 | 77.487(13)                            | 75.759(5)                             |
| $\gamma/^\circ$                | 68.120(14)                            | 67.089(5)                             |
| V/ Å <sup>3</sup>              | 1193.1(3)                             | 1262.91(13)                           |
| Z                              | 2                                     | 2                                     |
| Density/gcm <sup>-1</sup>      | 1.340                                 | 1.354                                 |
| Absorption Coefficient         | 0.589                                 | 0.563                                 |
| Absorption Correction          | Multi-scan                            | Multi-scan                            |
| F(000)                         | 506                                   | 538.88                                |
| Total no of reflections        | 4310                                  | 5752                                  |
| Reflections, $I > 2\sigma(I)$  | 2735                                  | 4683                                  |
| Max. $2\theta/^\circ$          | 25.25                                 | 28.89                                 |
| Ranges (h, k, l)               | -10 ≤ h ≤ 10                          | -21 ≤ h ≤ 33                          |
|                                | -10 ≤ k ≤ 10                          | -8 ≤ k ≤ 153                          |
|                                | -19 ≤ l ≤ 17                          | -9 ≤ l ≤ 10                           |
| Complete to $2\theta(\%)$      | 99.8                                  | 99.8                                  |
| Refinement method              | Full-matrix least-squares<br>on $F^2$ | Full-matrix least-squares<br>on $F^2$ |
| Goof ( $F^2$ )                 | 1.111                                 | 1.062                                 |
| R indices [ $I > 2\sigma(I)$ ] | 0.0768                                | 0.0563                                |
| R Indices (all data)           | 0.1149                                | 0.0698                                |

**Table S2.** Selected bond parameters of complexes [Mn]-1 and [Mn]-2.

|                                | [Mn]-1   | [Mn]-2   |
|--------------------------------|----------|----------|
| <b><i>Bond lengths (Å)</i></b> |          |          |
| Mn1-N1                         | 2.158(4) | 2.156(2) |
| Mn1-N3                         | 2.164(4) | 2.175(2) |
| Mn1-O1                         | 2.178(4) | 2.141(2) |

|                               |            |            |
|-------------------------------|------------|------------|
| Mn1-O3                        | 2.060(4)   | 2.073(2)   |
| <b><i>Bond angles (°)</i></b> |            |            |
| O3-Mn1-N3                     | 127.79(16) | 107.40(9)  |
| O3-Mn1-N1                     | 111.64(15) | 129.66(10) |
| N3-Mn1-N1                     | 86.14(15)  | 87.93(8)   |
| O3-Mn1-O1                     | 97.76(15)  | 95.14(9)   |
| N3-Mn1-O1                     | 130.29(14) | 99.18(8)   |
| N1-Mn1-O1                     | 95.28(15)  | 130.25(8)  |
| O3-Mn1-O1                     | 103.09(15) | 95.25(10)  |
| N1-Mn1-O1                     | 89.80(14)  | 130.11(9)  |
| O2-Mn1-O1                     | 57.68(13)  | 56.99(8)   |

---

**Table S3.** Comparative chart showing the literature available catalysts explored for oxidative coupling of benzylamines

| Catalysts                                                                          | Substrate    | Solvent                             | Air/O <sub>2</sub>        | T (°C) | t (h) | TON   | TOF (h <sup>-1</sup> ) | Ref. |
|------------------------------------------------------------------------------------|--------------|-------------------------------------|---------------------------|--------|-------|-------|------------------------|------|
| CuCl                                                                               | Benzyl amine | Solvent Free                        | air                       | 100    | 18    | 200   | 11.11                  | S1   |
| CuBr <sub>2</sub> + TEMPO                                                          | Benzyl amine | CH <sub>3</sub> CN/H <sub>2</sub> O | air                       | 25     | 12    | 40    | 3.33                   | S2   |
| 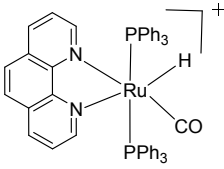   | Benzyl amine | TEMPO (20%)<br>in Toluene           | O <sub>2</sub><br>(1 atm) | 90     | 24    | 49    | 2.04                   | S3   |
|   | Benzyl amine | Ionic liquid                        | O <sub>2</sub><br>(1 atm) | 120    | 6     | 40    | 6.66                   | S4   |
| CuPF <sub>6</sub> <sup>-</sup>                                                     | Benzyl amine | CH <sub>3</sub> CN                  | O <sub>2</sub><br>(1 atm) | rt     | 3     | 14.20 | 4.73                   | S5   |
|  | Benzyl amine | dioxane                             | O <sub>2</sub><br>(6 atm) | 130    | 3     | 10000 | 3333                   | S6   |
| CoL <sup>*</sup>                                                                   | Benzyl amine | water                               | air                       | 40     | 12    | 128   | 10.66                  | S7   |
|  |              |                                     |                           |        |       |       |                        |      |
|  | Benzyl amine | Toluene/ t-BuOOH                    | air                       | rt     | 0.25  | 3333  | 13333                  | S8   |

|                                                                                    |                              |                                     |                           |             |     |       |       |     |
|------------------------------------------------------------------------------------|------------------------------|-------------------------------------|---------------------------|-------------|-----|-------|-------|-----|
| Au/Al <sub>2</sub> O <sub>3</sub>                                                  | Benzyl amine                 | Toluene                             | O <sub>2</sub><br>(1 atm) | 100         | 24  | -     | -     | S9  |
| PI/CB-Pt                                                                           | Dibenzylamine                | CDCl <sub>3</sub> /H <sub>2</sub> O | O <sub>2</sub><br>(1 atm) | 30          | 16  | 176   | 11    | S10 |
| Nb <sub>2</sub> O <sub>5</sub>                                                     | Benzyl amine                 | Benzene                             | O <sub>2</sub><br>(1 atm) | irradiation | 50  | 13.29 | 0.26  | S11 |
| 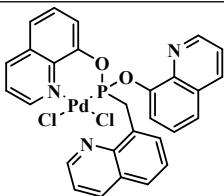   | Benzyl amine                 | Solvent Free                        | air                       | 80          | 6   | 100   | 16.7  | S12 |
|  | Benzyl amine                 | CH <sub>3</sub> CN                  | air                       | 30          | 3   | 30.4  | 10.13 | S13 |
|  | Benzyl amine                 | Solvent free                        | air                       | 100         | 10  | 100   | 10    | S14 |
|  | N,N- dimethyl<br>benzylamine | CH <sub>3</sub> CN                  | air                       | 80          | 1.5 | 82    | 54.66 | S15 |

## References

- S1. R. D. Patil and S. Adimurthy, *Adv. Synth. Catal.*, 2011, **353**, 1695-1700.
- S2. Z. Hu and F. M. Kerton, *Org. Biomol. Chem.*, 2012, **10**, 1618-1624.
- S3. R. Ray, S. Chandra, V. Yadav, P. Mondal, D. Maiti and G. K. Lahiri, *Chem. Commun.*, 2017, **53**, 4006-4009.
- S4. K. Marui, A. Nomoto, H. Akashi and A. Ogawa, *Synthesis*, 2016, **48**, 31-32.
- S5. B. Xu, E. M. Hartigan, G. Feula, Z. Huang, J. P. Lumb and B. A. Arndtsen, *Angew. Chem., Int. Ed.*, 2016, **55**, 15802-15806.
- S6. S. Zhao, C. Liu, Y. Guo, J. C. Xiao and Q. Y. Chen, *J. Org. Chem.*, 2014, **79**, 8926-8931.
- S7. S. Hazra, P. Pilania, M. Deb, A. K. Kushawaha and A. J. Elias, *Chem. Eur. J.*, 2018, **24**, 15766-15771.
- S8. Q. L. Yuan, X. T. Zhou and H. B. Ji, *Catal. Commun.*, 2010, **12**, 202-206.
- S9. M. LARGERON. *Eur. J. Org. Chem.*, 2013, 5225-5235.
- S10. H. Yuan, W. J. Yoo, H. Miyamura and S. Kobayashi, *J. Am. Chem. Soc.*, 2012, **134**, 13970-13973.
- S11. S. Furukawa, Y. Ohno, T. Shishido, K. Teramura and T. Tanaka, *ACS Catal.*, 2011, **1**, 1150-1153.
- S12. R. E. R. Lugo, M. A. C. Teran, S. De Leon, M. Vogt, A. J. Rosenthal and V. R. Landaeta, *Dalton Trans.*, 2018, **47**, 2061-2072.
- S13. A. T. Murray, R. King, J. V. G. Donnelly, M. J. H. Dowley, F. Tuna, D. Sells, M. P. John, and D. R. Carbery, *ChemCatChem*, 2016, **8**, 510 – 514.
- S14. Y. Zhang, F. Lu, R. Huang, H. Zhang and J. Zhao, *Catal. Commun.*, 2016, **81**, 10-13.
- S15. M. Rueping, C. Vila, A. Szadkowska, R. M. Koenigs and J. Fronert, *ACS Catal.*, 2012, **2**, 2810-2815.
